# 1 **A Population Genomics Analysis of the Native Irish Galway Sheep**

## 2 **Breed**

3 Gillian P. McHugo<sup>1</sup>, Sam Browett<sup>1,†</sup>, Imtiaz A. S. Randhawa<sup>2,‡</sup>, Dawn J. Howard<sup>3,§</sup>, Michael  
4 P. Mullen<sup>3,§</sup>, Ian W. Richardson<sup>4</sup>, Stephen D. E. Park<sup>4</sup>, David A. Magee<sup>1</sup>, Erik Scraggs<sup>1</sup>,  
5 Michael Dover<sup>1</sup>, Carolina N. Correia<sup>1</sup>, James P. Hanrahan<sup>3,¶</sup>, David E. MacHugh<sup>1,5</sup>

6

7 <sup>1</sup> Animal Genomics Laboratory, UCD School of Agriculture and Food Science, University  
8 College Dublin, Belfield, Dublin, D04 V1W8, Ireland.

9 <sup>2</sup> Sydney School of Veterinary Science, University of Sydney, Camden, NSW 2570, Australia.

10 <sup>3</sup> Animal and Grassland Research and Innovation Centre, Teagasc, Mellows Campus, Athenry,  
11 Co. Galway H65 R718, Ireland.

12 <sup>4</sup> IdentiGEN Ltd., Blackrock Business Park, Blackrock, Dublin, A94 H2X4, Ireland.

13 <sup>5</sup> UCD Conway Institute of Biomolecular and Biomedical Research, University College  
14 Dublin, Belfield, Dublin D04 V1W8, Ireland.

15

16

17

18

19

20

21

22 **Note:** British English language style preferred for publication.

## 23 **Correspondence**

24 D. E. MacHugh, Animal Genomics Laboratory, UCD School of Agriculture and Food Science,  
25 University College Dublin, Belfield, Dublin, D04 V1W8, Ireland.

26 Email: [david.machugh@ucd.ie](mailto:david.machugh@ucd.ie)

27 Phone: +353 1 716 6256

28

## 29 **Current addresses**

30 † Ecosystems and Environment Research Centre, School of Environment and Life Sciences,  
31 University of Salford, Manchester, M5 4WT, United Kingdom.

32 ‡ School of Veterinary Science, University of Queensland, Gatton, QLD 4343, Australia.

33 § Department of Life and Physical Sciences, Athlone Institute of Technology, Athlone, Co.  
34 Westmeath, N37 A3W4, Ireland.

35 ¶ UCD School of Veterinary Medicine, University College Dublin, Belfield, Dublin, D04  
36 V1W8, Ireland.

## 37 **SUMMARY**

38       The Galway sheep population is the only native Irish sheep breed and represents an  
39 important livestock genetic resource, which is currently categorised as “at-risk”. In the present  
40 study, comparative population genomics analyses of Galway sheep and other sheep populations  
41 of European origin were used to investigate the microevolution and recent genetic history of  
42 the breed. These analyses support the hypothesis that British Leicester sheep were used in the  
43 formation of the Galway breed and suggest more recent gene flow from the Suffolk sheep  
44 breed. When compared to conventional and endangered breeds, the Galway breed was  
45 intermediate in effective population size, genomic inbreeding and runs of homozygosity. This  
46 indicates that, although the Galway breed is declining, it is still relatively genetically diverse  
47 and that conservation and management plans informed by genomic information may aid its  
48 recovery. The Galway breed also exhibited distinct genomic signatures of artificial or natural  
49 selection when compared to other breeds, which highlighted candidate genes that may be  
50 involved in meat and wool production.

51

## 52 **Keywords**

53 sheep, conservation genomics, at-risk breed, inbreeding, genetic diversity, population  
54 genomics, selection signature, single nucleotide polymorphism

55

## 56 INTRODUCTION

57 Sheep were domesticated more than 10,000 years ago and have since been bred for a  
58 variety of uses including meat, milk and wool production (Taberlet et al., 2011; Larson and  
59 Fuller, 2014; MacHugh et al., 2017). During the last 50 years, the focus of the global sheep  
60 industry on only a subset of the 1,400 recorded sheep breeds with enhanced productivity and  
61 high-quality outputs has resulted in many locally-adapted (local) breeds becoming endangered  
62 or extinct (Taberlet et al., 2008; Kijas et al., 2009; Kijas et al., 2012). These breeds are generally  
63 considered independent genetic units because crosses are usually not used for further  
64 reproduction (Taberlet et al., 2008). Local or heritage livestock breeds are important because  
65 they constitute reservoirs of biological diversity which may be important genetic resources for  
66 domestic animal species in the face of climate change and increased food requirements in the  
67 future (Taberlet et al., 2008; Bowles, 2015). In particular, functionally important natural  
68 sequence variants (NSVs) identified in the genomes of local or heritage breeds may become  
69 increasingly important as targeted genome editing technologies are employed in genetic  
70 improvement programmes (Wells, 2013; Petersen, 2017; Van Eenennaam, 2017).

71 The local sheep breeds on the periphery of Northern Europe are recognised as heritage  
72 livestock populations that should be conserved and represent important sources of novel  
73 genetic diversity accumulated over centuries of microevolution and adaptation to marginal  
74 agroecological environments (Tapio et al., 2005). In this regard, the Galway sheep breed is the  
75 only surviving sheep breed native to Ireland (Curran, 2010); it was once the principal lowland  
76 sheep breed in the west of the country, but is now considered at-risk by the Food and  
77 Agriculture Organization (Food and Agriculture Organization, 2019).

78

79           The Galway breed is thought to have originated in the 1840s and is likely to have emerged  
80 as a composite breed from several indigenous and imported sheep populations present in  
81 Ireland at that time (Hanrahan, 1999), including the important Dishley or New Leicester  
82 foundational breed developed by Robert Bakewell (Wykes, 2004). However, it was not until  
83 1923 that a formal herd book was established (Curran, 2010; Food and Agriculture  
84 Organization, 2019). Therefore, the range of sheep populations ancestral to the Galway breed  
85 in the 18<sup>th</sup> and 19<sup>th</sup> centuries, coupled with the possibility of more recent gene flow poses  
86 questions concerning the genetic distinctiveness and admixture history of the breed. In  
87 addition, the Galway breed has declined from a peak population size in the 1960s when it was  
88 the focus of lowland sheep farming in western Ireland (Martin, 1975a; Raftice, 2001; Curran,  
89 2010). By 1994, as defined by the UK Rare Breeds Survival Trust, the Galway breed had  
90 reached “critical” status for sheep breeds with only 300 pedigree breeding ewes registered  
91 (Curran, 2010). Since being classed as endangered by the Irish Government in 1998, the  
92 number of pedigree Galway sheep has increased due to conservation efforts; however, the  
93 breed population size is currently decreasing, raising concerns regarding remaining genetic  
94 diversity and the overall viability of the population (Curran, 2010; Food and Agriculture  
95 Organization, 2019).

96           As a local breed with a low census population size, the main threat to the long-term  
97 survival of the Galway breed is replacement by more productive commercial breeds, which  
98 would further reduce the population size, reduce genetic diversity and increase inbreeding.  
99 Other challenges faced by threatened local livestock breeds include increased genetic drift,  
100 poor animal husbandry and management, deliberate or inadvertent crossbreeding and  
101 geographical isolation, which increases the risk of extinction (Taberlet et al., 2008; Allendorf  
102 et al., 2013). In recent years, with the availability of increasingly powerful genomics  
103 technologies, a conservation programme for Galway sheep has been proposed that would

104 leverage molecular genetic information (McHugh et al., 2014). McHugh and colleagues also  
105 propose that genome-enabled breeding (genomic selection) could be used in threatened  
106 livestock populations to improve production, health and reproduction traits, thereby  
107 decelerating replacement by modern breeds (Biscarini et al., 2015).

108 To provide information that may be relevant to genetic conservation of the Galway sheep  
109 breed, in the present study we performed high-resolution population genomics analyses in  
110 conjunction with 21 comparator breeds of European origin. These analyses included  
111 multivariate analyses of genomic diversity, phylogenetic network graph reconstruction,  
112 evaluation of genetic structure and inbreeding, modelling of historical effective population  
113 sizes and functional analyses of artificial and natural selection across the Galway sheep  
114 genome.

In review

## 115 MATERIALS AND METHODS

### 116 Galway and Irish Suffolk Sheep DNA Sampling

117 The Galway and Irish Suffolk sheep DNA samples used for the current survey were  
118 generated from peripheral blood samples collected in standard heparinised Vacutainer blood  
119 collection tubes (Becton-Dickinson Ltd., Dublin, Ireland). High-quality genomic DNA was  
120 then purified from 200  $\mu$ l of blood from each animal using standard laboratory methods  
121 (Howard, 2008).

### 122 Additional SNP Data Sources and Data Filtering

123 High-density SNP data were obtained from the International Sheep Genomics  
124 Consortium Sheep HapMap Project and consisted of 2,819 sheep from 74 breeds genotyped  
125 for 49,034 evenly-spaced SNPs using the Illumina<sup>®</sup> OvineSNP50 BeadChip (Kijas et al.,  
126 2012). To focus on the Galway breed, a core sample set of 11 breeds, including the Galway  
127 breed, was selected for the primary population genomic analyses ( $n = 615$  animals). This  
128 included populations previously examined and known to be more closely related due to their  
129 shared European origins (Howard, 2008; Kijas et al., 2012). These comparator populations also  
130 included widely used breeds, such as the Merino (MER) breed, and at-risk heritage breeds,  
131 such as the Dorset Horn (DSH), Soay (SOA) and Wiltshire (WIL) breeds (Food and Agriculture  
132 Organization, 2019) **Figure 1**, and Supplementary Table 1 provide further information on the  
133 geographical origins of the 11 breeds used for the core sample set analyses. In addition,  
134 Supplementary Table 1 provides information on an expanded sample set of 22 European and  
135 Asian breeds, including the core sample set, used for the phylogenetic tree and network graph  
136 reconstructions ( $n = 1,003$ ).

137 The initial data set had already been filtered to remove SNPs with  $< 0.99$  call rate, assay  
138 abnormality,  $MAF < 0.01$ , discordant genotypes and inheritance problems (Kijas et al., 2012).  
139 The core and extended sample genome-wide SNPs data sets for this study were filtered using  
140 PLINK v1.07 (Purcell et al., 2007) to remove SNPs lacking positional information, SNPs  
141 unassigned to any chromosome, or SNPs assigned to the X and Y chromosomes (Patterson et  
142 al., 2006; Purfield et al., 2012). The final filtered data set was composed of 47,412 SNPs with  
143 a total genotyping rate of 99.7%.

#### 144 **Principal Component Analysis**

145 Principal component analysis (PCA) was performed using 47,412 genome-wide SNPs  
146 and SMARTPCA from the EIGENSOFT software package (version 4.2) (Patterson et al.,  
147 2006). The number of autosomes was set to 26 and breed names were included. The number  
148 of outlier removal iterations was set to 0 since outliers could flag individual animals that were  
149 the result of crossbreeding. PCA plot visualisations were generated using ggplot2 (Wickham,  
150 2016).

#### 151 **$F_{ST}$ Analysis**

152 Pairwise  $F_{ST}$  values (Weir and Cockerham, 1984) were calculated for each pair of breeds  
153 using 47,412 genome-wide SNPs and PLINK v1.9 (Chang et al., 2015). Weighted values were  
154 chosen to account for different sample sizes for each breed.

#### 155 **Construction of Phylogenetic Trees and Ancestry Graphs**

156 Maximum likelihood (ML) phylogenetic trees with ancestry graphs were generated for  
157 the core and extended sample data sets using 47,412 genome-wide SNPs and the TreeMix  
158 (version 1.12) software package. For the core sample set, the Italian Comisana breed (COM)  
159 (Ciani et al., 2014) was used as an outgroup and five migration edges were used for TreeMix



160 visualisation (Pickrell and Pritchard, 2012). The analysis was repeated using the extended  
161 sample set of 21 European breeds (Supplementary Table 1) and the Indian Garole breed (GAR)  
162 was used as an outgroup, again with five migration edges for TreeMix visualisation.

### 163 **Genetic Structure and Admixture History**

164 Genetic structure and admixture history was investigated for the core sample set of the  
165 Galway and ten other breeds using 47,412 genome-wide SNPs and fastSTRUCTURE (version  
166 1.0) (Raj et al., 2014) as described previously by us (Browett et al., 2018). The analysis was  
167 performed with the model complexity, or number of assumed populations,  $K = 2$  to 11. The  
168 simple prior approach described by Raj et al. (2014) was used, which is sufficient for modelling  
169 population/breed divergence. The “true”  $K$ -value for the number of ancestral populations was  
170 estimated using a series of fastSTRUCTURE runs with pre-defined  $K$ -values that were  
171 examined using the *chooseK.py* script (Raj et al., 2014). Outputs from the fastSTRUCTURE  
172 analyses were visualised using the DISTRUCT software program (version 1.1) with standard  
173 parameters (Rosenberg, 2004).

### 174 **Modelling of Current and Historical Effective Population Size**

175 Current and historical effective population size ( $N_e$ ) trends were modelled with genome-  
176 wide SNP linkage disequilibrium data from 47,412 genome-wide SNPs for the core sample set  
177 using the *SNeP* software tool (version 1.1) (Barbato et al., 2015) implementing the method for  
178 unphased SNP data as described previously by us (Browett et al., 2018). Graphs used to  
179 visualise trends in  $N_e$  were generated using ggplot2 (Wickham, 2016).

### 180 **Analysis of Genomic Inbreeding and Runs of Homozygosity**

181 Analysis of genomic inbreeding based on the inbreeding coefficient ( $F$ ) estimated from  
182 SNP heterozygosity data was performed using 47,412 genome-wide SNPs and the PLINK

183 v1.07 --het command (Purcell et al., 2007) since comparable inbreeding results have been  
184 observed using pruned or unpruned data for a SNP data set of similar size (Binns et al., 2012).

185 Runs of homozygosity (ROH) are continuous tracts of homozygosity that most likely  
186 arise due to inbreeding and can be identified through surveys of genome-wide SNP data in  
187 populations (Curik et al., 2014; Peripolli et al., 2017). Individual animal genomic inbreeding  
188 was evaluated as genome-wide autozygosity estimated from the SNP data using runs of  
189 homozygosity (ROH) values generated with PLINK v1.07 (Purcell et al., 2007) and the  $F_{ROH}$   
190 statistic introduced by McQuillan et al. (2008) with methodologies previously described in  
191 detail by Purfield et al. (2012) and Browett et al. (2018). The  $F_{ROH}$  statistic represents the  
192 proportion of each individual animal's genome covered by ROH, which is generally a  
193 consequence of historical inbreeding. Statistical analysis was carried out in R and graphs used  
194 to visualise  $F$ ,  $F_{ROH}$  and ROH distributions were generated using ggplot2 (Wickham, 2016; R  
195 Core Team, 2018).

## 196 **Genome-wide Detection of Signatures of Selection and Functional** 197 **Enrichment Analysis**

198 The composite selection signal (CSS) method (Randhawa et al., 2014) was used to detect  
199 genomic signatures of selection as previously described (Browett et al., 2018). The CSS  
200 approach combines the fixation index ( $F_{ST}$ ), the directional change in selected allele frequency  
201 ( $\Delta SAF$ ) and cross-population extended haplotype homozygosity (XP-EHH) tests into one  
202 composite statistic for each SNP in a population genomics data set (Randhawa et al., 2014).  
203 For the present study, we used 47,412 genome-wide SNPs genotyped in 49 individual Galway  
204 sheep (GAL) samples and a sample of 50 randomly selected sheep (5 selected at random from  
205 each of the other 10 breeds in the core data set). To mitigate against false positives, genomic  
206 selection signatures were only considered significant if at least one SNP from the set of the top

207 0.1% genome-wide CSS scores was flanked by at least five SNPs from the set of the top 1%  
208 CSS scores.

209 As described previously (Browett et al., 2018), the Ensembl BioMart data mining  
210 resource (Smedley et al., 2015) was used to identify genes within  $\pm 1.0$  Mb of each selection  
211 peak (Ensembl release 85, July 2016). Ingenuity<sup>®</sup> Pathway Analysis (IPA<sup>®</sup>: Qiagen, Redwood  
212 City, CA, USA; release date July 2016) was then used to perform an overrepresentation  
213 enrichment analysis with this gene set to identify canonical pathways and functional processes  
214 of biological importance. The total gene content of Ensembl release 85 version of the OAR3.1  
215 ovine genome assembly (Jiang et al., 2014) was used as the most appropriate reference gene  
216 set for these analyses (Timmons et al., 2015).

217

In review

## 218 **RESULTS AND DISCUSSION**

### 219 **Analyses of Breed Divergence, Genetic Differentiation and Admixture**

220 The results of multiple population genomics analyses support the genetic distinctiveness  
221 of the Galway sheep population as a discrete breed. The PCA results plotted in **Figure 2**  
222 demonstrate separation of the majority of breeds into distinct population clusters, with the  
223 notable exceptions of the Australian Merino (MER) and Scottish Blackface (SBF). However,  
224 it is important to note that the PCA plot visualisation shown in **Figure 2** did not include the  
225 110 samples from the Soay breed (SOA). A long history as a relatively small isolated island  
226 population (Berenos et al., 2016) has led to a marked pattern of genetic differentiation from  
227 other breeds, which is evident in the first principal component (PC1) of Supplementary Figure  
228 1. Consequently, when the Soay breed is included in a PCA, PC3 is required to separate the  
229 Galway breed from the other populations (Supplementary Figure 2). Otherwise, the Galway  
230 breed clusters with the Scottish Texel breed (STX) and is located close to the Border Leicester  
231 breed (BLR). This result supports the documented role for the foundational New Leicester  
232 breed in the formation of the Galway and Texel breeds (Porter et al., 2016) and is compatible  
233 with the results of a previous study using autosomal microsatellites (Howard, 2008).

234 The PCA plot shown in **Figure 2** also demonstrated that a number of individual sheep  
235 do not cluster closely with other animals from their breeds. This is likely due to recent  
236 unacknowledged or inadvertent crossbreeding between animals from different populations  
237 (Patterson et al., 2006) or, alternatively, potential mislabelling of particular samples. For  
238 example, the 2D and 3D PCA plots shown in Supplementary Figures 1 and 2 indicate that one  
239 of the Irish Suffolk animals (ISF25) was most likely a mislabelled Scottish Texel sample as it  
240 emerged within the main Texel cluster for PC1, PC2 and PC3. Consequently, this sample ISF25  
241 was removed from all subsequent analyses.

242 The PCA results are supported by the interpopulation weighted  $F_{ST}$  values for each pair  
243 of breeds shown in Supplementary Table 2. The results range from 0.080 (Australian Merino  
244 and Scottish Blackface) to 0.326 (Soay and Wiltshire). The pairwise  $F_{ST}$  values observed for  
245 the Galway population sample indicates that, with the exception of the genetically distinctive  
246 Soay sheep population (SOA), which inhabits a small island, the breed exhibits moderate  
247 genetic differentiation from other European breeds. The Galway breed exhibited relatively low  
248 pairwise  $F_{ST}$  values with the New Zealand Romney (ROM: 0.110), Australian Merino (MER:  
249 0.118) and Scottish Texel (STX: 0.119) breeds. This is unsurprising because the Romney,  
250 Merino and Texel breeds are known to have shared origins with the Galway breed (Curran,  
251 2010; Porter et al., 2016; Food and Agriculture Organization, 2019).

252 The ML phylogeny and ancestry graph in **Figure 3** shows that the Galway breed groups  
253 closely with sheep populations of English and Dutch origin, particularly the Border Leicester  
254 (BRL) and the Scottish Texel (STX) breeds. This observation concords with previous  
255 population genomics studies (Kijas et al., 2012; Fariello et al., 2013) and known breed histories  
256 due to the shared historical input of the foundational New Leicester breed (Curran, 2010). The  
257 ML phylogeny and ancestry graph generated with additional European breeds and shown in  
258 Supplementary Figure 5 also supports the close relationship among the Galway, BRL and STX  
259 breeds. The arrows (graph edges) on **Figure 3** indicate gene flow modelled between  
260 populations with the colour scale representing the weight of each migration event. Inspection  
261 of **Figure 3** indicates possible historical gene flow between the Irish Suffolk and Galway  
262 branches.

263 Results of the genetic structure analysis for individual animals grouped by population are  
264 shown in **Figure 4**. Model complexity or numbers of assumed populations ( $K$ ) ranging from 2  
265 to 11 are visualised to explain the structure in the data and to maximise the marginal likelihood.  
266 These results demonstrate that the 11 breeds can be considered discrete populations, thereby

267 supporting interpretation of sheep breeds as separate genetic units (Taberlet et al., 2008) and  
268 the genetic distinctiveness of Galway sheep.

269 The colours on **Figure 4** indicate assignment of individual animals into modelled  
270 populations. As with the PCA shown in Supplementary Figure 1, the first split ( $K = 2$ ) separates  
271 the isolated Soay sheep population (SOA) from the other breeds. The second split ( $K = 3$ ) then  
272 differentiates the Finnish Landrace (FIN) from the remaining breeds. At  $K = 9$  the Galway  
273 breed emerges as a distinct cluster and this genetic component is also apparent in the New  
274 Zealand Romney breed (ROM). With  $K = 11$  each breed emerges as a distinct genetic cluster.  
275 However, some individual animals show evidence of prior crossbreeding or historical  
276 admixture, which is indicated by bars that exhibit varying colour proportions. Based on these  
277 results, some individual Galway animals exhibit 10% or more admixture with other sheep  
278 breeds, particularly the Border Leicester (BRL), Scottish Texel (STX) and Scottish Blackface  
279 (SBF). The observed signature of a Galway genomic component in the New Zealand Romney  
280 breed (ROM) is supported by the relatively low pairwise  $F_{ST}$  value for these breeds and their  
281 known origins (Supplementary Table 2) (Porter et al., 2016).

## 282 **Modelling Historical Effective Population Size**

283 **Figure 5** and Supplementary Table 4 provide the results of modelling historical effective  
284 population size ( $N_e$ ) for the range of conventional and at-risk sheep breeds (GAL, MER, BRL,  
285 DSH, FIN, ISF, ROM, SBF, STX and SOA). Inspection of **Figure 5** and Supplementary Table  
286 4 shows that the modelled historical trends in  $N_e$  for the 11 breeds analysed decline towards the  
287 present. However, the GAL breed are intermediate between the breeds with large census  
288 populations (FIN, ISF, MER, ROM, SBF and STX) and at-risk breeds with relatively small  
289 census populations (BRL, DSH, SOA, WIL) breeds. In addition, the most recent modelled  $N_e$   
290 value for the GAL breed is 184 animals 13 generations ago, which is comparable to some of

291 the breeds (e.g. ISF and STX with 178 and 150 animals, respectively). These modelled  $N_e$   
292 values, which are based on linkage disequilibrium, may be underestimates due to the physical  
293 linkage between many SNPs (Hall, 2016).

294 To examine these historical trends in  $N_e$  more systematically, the data for each breed  
295 were shown to be not normally distributed using the Kolmogorov-Smirnov test (Supplementary  
296 Table 3). Therefore, the non-parametric general Kruskal-Wallis test followed by pairwise  
297 Wilcoxon rank sum tests for all population/breed comparisons with adjustment for multiple  
298 statistical tests performed with the Bonferroni correction. This analysis demonstrated that the  
299 GAL historical  $N_e$  trend is significantly different only from the MER breed ( $P_{adj.} = 0.006$ ;  
300 Supplementary Table 5). Livestock populations tend to exhibit lower  $N_e$  values than  
301 comparable wild mammal populations (Waples et al., 2016). Notwithstanding this, from a  
302 conservation perspective, it is reassuring that the most recent estimated  $N_e$  value of 184 for the  
303 GAL is above the critical threshold of 100 animals considered essential for the long-term  
304 survival of livestock populations (Meuwissen, 2009). This “demographic fingerprint” (Barbato  
305 et al., 2015) is most likely a consequence of the widespread use of the Galway breed for  
306 lowland sheep production in Ireland up until the 1980s (Raftice, 2001; Curran, 2010).

### 307 **Genomic Inbreeding and Runs of Homozygosity**

308 The recent  $N_e$  of each of the sheep breeds modelled in **Figure 5** will have been  
309 substantially influenced by their inbreeding histories. In this regard, the genomic inbreeding  
310 coefficient ( $F$ ) values estimated for individual animals across all breeds range up to 0.389 for  
311 a single Dorset Horn (DSH) animal (**Figure 6**). The majority of  $F$  values for individual animals  
312 in each breed were not normally distributed based on Shapiro-Wilk test results (Supplementary  
313 Table 3); therefore, the median  $F$  values were generated and evaluated for each breed  
314 (Supplementary Table 6). The breeds with the highest median  $F$  values were the SOA (0.308)

315 and the WIL (0.299) and the two breeds with the lowest median  $F$  values were the MER (0.045)  
316 and the SBF (0.060). The other breeds exhibited intermediate median  $F$  values: BRL (0.243),  
317 DSH (0.169), FIN (0.087), GAL (0.127), ISF (0.185), ROM (0.086) and STX (0.111). These  
318 results provide a window on the different population histories for the breeds. For example,  
319 Soay sheep (SOA) have existed as a relatively small and isolated population on the island of  
320 Soay for hundreds of years and the Wilshire breed (WIL) have recently experienced a dramatic  
321 decline in census population and are considered at risk by the FAO (Food and Agriculture  
322 Organization, 2019). From a genetic conservation perspective, except for a single outlier  
323 (GAL26), it is encouraging that the Galway breed (GAL) exhibits an intermediate median  $F$   
324 value calculated using genome-wide SNP data.

325 A systematic analysis of  $F$  value distributions using the non-parametric Kruskal-Wallis  
326 test indicated there were significant differences among breeds ( $H = 477.33$ ,  $df = 10$ ,  
327  $P < 0.001$ ). An analysis of all pairwise breed comparisons using the non-parametric Wilcoxon  
328 rank sum test (with Bonferroni correction) was then performed (Supplementary Table 7). These  
329 results showed that the majority of pairwise comparisons were highly significant, again  
330 reflecting the distinct demographic histories of each breed.

331 Overall, comparable results to those obtained using the genomic inbreeding coefficient  
332 ( $F$ ) were observed for inbreeding coefficients estimated using ROH ( $F_{ROH}$ ) (**Figure 7**,  
333 Supplementary Tables 3, 6 and 8). However, there were some notable differences; in particular,  
334 the lower median  $F_{ROH}$  value of 0.101 for the Soay breed (SOA) is likely due to their longer  
335 geographical isolation and a consequence of early historical inbreeding that produced ROH  
336 tracts, which have broken down due to recombination (Barrett, 2012; Purfield et al., 2012). It  
337 is also notable that the Galway breed contains several individual animals with higher  $F_{ROH}$   
338 values (GAL15, GAL16, GAL18, GAL26 and GAL36) indicating that this statistic is useful  
339 for identifying animals that should not be prioritised for conservation programmes. With



340 regards to historical inbreeding in the Galway breed (GAL), inbreeding coefficients have  
341 previously been calculated using pedigree information for the population in 1969 ( $F = 0.019$ ;  
342 Martin, 1975b), 1999 ( $F = 0.020$ ; Raftice, 2001) and 2012 ( $F = 0.023$ ; McHugh et al., 2014).  
343 These results indicate that the general trend in inbreeding has been relatively moderate, which  
344 may also be reflected in the results obtained using genomic information reported in the present  
345 study. It is important to note that monitoring of inbreeding for genetic conservation and  
346 management of potentially deleterious recessive genomic variants can be greatly informed  
347 through evaluation of ROH parameters using high-density SNP data (Peripolli et al., 2017)

348         The mean sum of ROH for different length categories varies among the breeds (**Figure**  
349 **8**); however, none of the breeds exhibit large mean values for the total length of ROH in the 1  
350 to 5 Mb category. This is because the SNP density on the OvineSNP50 BeadChip is too low to  
351 accurately detect ROH in this size range (Purfield et al., 2012). Notwithstanding this limitation,  
352 patterns of ROH, which reflect both recent and older inbreeding histories are evident. For  
353 example, the Wiltshire breed (WIL) has large mean total ROH lengths for the other categories,  
354 presumably reflecting both historical and recent inbreeding. Other breeds, such as the  
355 Australian Merino (MER), have smaller mean total lengths of ROH in all categories, an  
356 observation that concurs with the results of the genomic inbreeding and the analysis of  $N_e$   
357 estimates. This is because individual animals from breeds with larger effective population  
358 sizes—such as the Australian Merino—are less likely to be the result of inbreeding and  
359 therefore less likely to exhibit large ROH segments in their genomes (Curik et al., 2014;  
360 Peripolli et al., 2017). The converse of this is true for breeds with lower  $N_e$  values and large  
361 ROH tracts in their genomes, such as the endangered Wiltshire breed. In terms of mean total  
362 length of ROH, the Galway breed emerges between these extremes, reflecting an intermediate  
363 effective population size and history of moderate inbreeding (**Figure 8**). In conjunction with

364 the other analyses of genomic diversity, these results are also encouraging for genetic  
365 conservation and the long-term viability of the breed.

### 366 **Signatures of Selection in the Galway Sheep Breed**

367 Using defined criteria, five significant peaks of selection were detected with the CSS  
368 approach (**Figure 9**): two on OAR1, one on OAR3 and two on OAR8 (that merge into one  
369 peak on the graph). Each selection peak was located in a ROH tract detected in at least three  
370 Galway samples, which may indicate reduced genetic diversity in these regions as a  
371 consequence of localised selective sweeps (Purfield et al., 2017). Detection of these selection  
372 peaks demonstrates that the Galway population has experienced a unique history of both natural  
373 and human-mediated selection, presumably because of adaptation to the agroecology of  
374 Ireland, a large Northwestern European island with a temperate oceanic climate.

375 The precise locations of the peaks that have clusters of SNPs within the top 0.1% CSS  
376 score class are provided with additional information in Supplementary Table 9. The 197 genes  
377 within these regions are listed in Supplementary Table 10. Using IPA<sup>®</sup>, the top five  
378 physiological system development and function pathways enriched for the subset of 119 genes  
379 that could be mapped to HGNC symbols were identified and are listed in **Table 1** (Krämer et  
380 al., 2013).

381 Of the 119 candidate genes hypothesised to be under selection in the Galway breed, 28  
382 are involved in tissue development and 15 are involved in connective tissue development and  
383 function. This is likely because the Galway breed is primarily used for meat production (Food  
384 and Agriculture Organization, 2019). In this regard, it is important to note that sheep breeds  
385 used for large-scale meat production, such as the Texel and New Zealand Romney, possess  
386 specific mutations in muscle development genes that have been subject to intense artificial  
387 selection (Cockett et al., 2005; Clop et al., 2006; Wang et al., 2016). Seven of the 119 genes

388 are involved in hair and skin development and function, which may be explained by the use of  
389 Galway sheep in wool production (Curran, 2010). Selection and maintenance of traits that  
390 confer resilience to infectious disease is important in domestic animal populations, including  
391 many sheep breeds (Bishop and Woolliams, 2014; Bishop, 2015). Thirteen of the 119 genes  
392 under the selection peaks are involved in immune cell trafficking; which may be as a result of  
393 the climate and unique disease challenges posed by the Irish environment, such as the  
394 prevalence of liver fluke (Toolan et al., 2015). A large group of 26 genes enriched for  
395 haematological system development and function were also located under the selection peaks;  
396 however, a microevolutionary explanation for this is not hypothesised here.

### 397 **Genetic Conservation of the Galway Sheep Breed**

398 The results of the population genomics analyses presented here are mutually consistent  
399 and highlight the utility of dense genome-wide marker data for conservation genomics in  
400 livestock populations; particularly for at-risk heritage landrace populations such as the Galway  
401 breed. Our results show the Galway breed is genetically distinct from other European sheep  
402 breeds, emerging in multivariate PCA and phylogenetic tree network graph visualisations as a  
403 distinct group but close to the Border Leicester breed (BRL), which has been observed  
404 previously (Kijas et al., 2012). In terms of effective population size and genomic inbreeding,  
405 the Galway breed emerged as intermediate between non-endangered and endangered sheep  
406 breeds. This indicates that there is substantial genetic diversity remaining in the population,  
407 which could be managed with a conservation programme that is informed by genomic  
408 information.

409

410

## 411 **DATA ACCESSIBILITY**

412       The Galway sheep (GAL) and additional sheep breed Illumina® OvineSNP50 BeadChip  
413 data are available as part of the International Sheep Genomics Consortium Ovine SNP50  
414 HapMap Dataset ([www.sheephapmap.org/download.php](http://www.sheephapmap.org/download.php)).

415

## 416 **ETHICS STATEMENT**

417       Animal biological sample collection was conducted under license issued in accordance  
418 with Irish and European Union legislation (Cruelty to Animals Act, 1876, and European  
419 Community Directive, 86/609/EC) as described previously (Mullen et al., 2013). All animals  
420 were managed in accordance with the guidelines for the accommodation and care of animals  
421 under Article 5 of the Directive.

422

## 423 **AUTHOR CONTRIBUTIONS**

424       DEM, DJH, MPM and JPH conceived and designed the project; DJH, MPM, DAM, ES  
425 and JPH organised sample collection and genotyping; GPM, SB, IAR, IWR, SDEP, MJD and  
426 CNC performed the analyses; GPM and DEM wrote the manuscript and all authors reviewed  
427 and approved the final manuscript.

428

429

## 430 **FUNDING**

431 This work was supported by Department of Agriculture, Food and the Marine (DAFM)  
432 funding under the Genetic Resources for Food and Agriculture scheme (grant no: 09/GR/06);  
433 an Investigator Programme Grant from Science Foundation Ireland (SFI/08/IN.1/B2038); a  
434 Research Stimulus Grant from DAFM (RSF 06 406); a European Union Framework 7 Project  
435 Grant (KBBE-211602-MACROSYS); the Brazilian Science Without Borders Programme  
436 (CAPES grant no. BEX-13070-13-4) and the UCD MSc Programme in Evolutionary Biology.

437

## 438 **CONFLICT OF INTEREST STATEMENT**

439 The authors Ian W. Richardson and Stephen D. E. Park are employed by IdentiGEN, Ltd.  
440 All other authors declare no competing interests and that the research was conducted in the  
441 absence of any commercial or financial relationships that could be construed as a potential  
442 conflict of interest.

443

## 444 **ACKNOWLEDGEMENTS**

445 The authors would like to thank Jon Yearsley, Kay Nolan, John Leech, Lorenzo de Jonge,  
446 Charlotte Gilbert and Han Haige for helpful discussion and feedback. We also thank members  
447 of the Galway Sheep Breeders Association for their cooperation in sample and data collection.  
448 Genotypic data used in this study was collected as part of a coordinated international project  
449 run under the auspices of the International Sheep Genomics Consortium.

## 450 REFERENCES

- 451 Allendorf, FW, Luikart, G, and Aitken, SN (2013). *Conservation and the Genetics of*  
452 *Populations*. Oxford, UK: John Wiley & Sons.
- 453 Barbato, M, Orozco-terWengel, P, Tapio, M, and Bruford, MW (2015). *SNeP*: a tool to  
454 estimate trends in recent effective population size trajectories using genome-wide SNP  
455 data. *Front Genet* 6, 109. doi: 10.3389/fgene.2015.00109.
- 456 Barrett, RD (2012). Bad coat, ripped genes: cryptic selection on coat colour varies with  
457 ontogeny in Soay sheep. *Mol Ecol* 21, 2833-2835. doi: 10.1111/j.1365-  
458 294X.2012.05560.x.
- 459 Berenos, C, Ellis, PA, Pilkington, JG, and Pemberton, JM (2016). Genomic analysis reveals  
460 depression due to both individual and maternal inbreeding in a free-living mammal  
461 population. *Mol Ecol* 25, 3152-3168. doi: 10.1111/mec.13681.
- 462 Binns, MM, Boehler, DA, Bailey, E, Lear, TL, Cardwell, JM, and Lambert, DH (2012).  
463 Inbreeding in the Thoroughbred horse. *Anim Genet* 43, 340-342. doi: 10.1111/j.1365-  
464 2052.2011.02259.x.
- 465 Biscarini, F, Nicolazzi, EL, Stella, A, Boettcher, PJ, and Gandini, G (2015). Challenges and  
466 opportunities in genetic improvement of local livestock breeds. *Front Genet* 6, 33. doi:  
467 10.3389/fgene.2015.00033.
- 468 Bishop, SC (2015). Genetic resistance to infections in sheep. *Vet Microbiol* 181, 2-7. doi:  
469 10.1016/j.vetmic.2015.07.013.
- 470 Bishop, SC, and Woolliams, JA (2014). Genomics and disease resistance studies in livestock.  
471 *Livestock Sci* 166, 190-198. doi: 10.1016/j.livsci.2014.04.034.
- 472 Bowles, D (2015). Recent advances in understanding the genetic resources of sheep breeds  
473 locally-adapted to the UK uplands: opportunities they offer for sustainable productivity.  
474 *Front Genet* 6, 24. doi: 10.3389/fgene.2015.00024.
- 475 Browett, S, McHugo, G, Richardson, IW, Magee, DA, Park, SDE, Fahey, AG, Kearney, JF,  
476 Correia, CN, Randhawa, IAS, and MacHugh, DE (2018). Genomic characterisation of  
477 the indigenous Irish Kerry cattle breed. *Front Genet* 9, 51. doi:  
478 10.3389/fgene.2018.00051.
- 479 Chang, CC, Chow, CC, Tellier, LC, Vattikuti, S, Purcell, SM, and Lee, JJ (2015). Second-  
480 generation PLINK: rising to the challenge of larger and richer datasets. *Gigascience* 4,  
481 7. doi: 10.1186/s13742-015-0047-8.

- 482 Ciani, E, Crepaldi, P, Nicoloso, L, Lasagna, E, Sarti, FM, Moioli, B, Napolitano, F, Carta, A,  
483 Usai, G, D'Andrea, M, Marletta, D, Ciampolini, R, Riggio, V, Occidente, M, Matassino,  
484 D, Kompan, D, Modesto, P, Macciotta, N, Ajmone-Marsan, P, and Pilla, F (2014).  
485 Genome-wide analysis of Italian sheep diversity reveals a strong geographic pattern  
486 and cryptic relationships between breeds. *Anim Genet* 45, 256-266. doi:  
487 10.1111/age.12106.
- 488 Clop, A, Marcq, F, Takeda, H, Pirottin, D, Tordoir, X, Bibe, B, Bouix, J, Caiment, F, Elsen,  
489 JM, Eychenne, F, Larzul, C, Laville, E, Meish, F, Milenkovic, D, Tobin, J, Charlier, C,  
490 and Georges, M (2006). A mutation creating a potential illegitimate microRNA target  
491 site in the myostatin gene affects muscularity in sheep. *Nat Genet* 38, 813-818.
- 492 Cockett, NE, Smit, MA, Bidwell, CA, Segers, K, Hadfield, TL, Snowden, GD, Georges, M,  
493 and Charlier, C (2005). The callipyge mutation and other genes that affect muscle  
494 hypertrophy in sheep. *Genet Sel Evol* 37 Suppl 1, S65-81.
- 495 Curik, I, Ferenčaković, M, and Sölkner, J (2014). Inbreeding and runs of homozygosity: A  
496 possible solution to an old problem. *Livestock Sci* 166, 26-34. doi:  
497 10.1016/j.livsci.2014.05.034.
- 498 Curran, PL (2010). *The Native Lowland Sheep of Galway and Roscommon: a History*. Tara,  
499 Co. Meath, Ireland: Patrick Leonard Curran.
- 500 Fariello, MI, Boitard, S, Naya, H, SanCristobal, M, and Servin, B (2013). Detecting signatures  
501 of selection through haplotype differentiation among hierarchically structured  
502 populations. *Genetics* 193, 929-941. doi: 10.1534/genetics.112.147231.
- 503 Food and Agriculture Organization. 2019. Domestic Animal Diversity Information System  
504 (DAD-IS); available at: [www.fao.org/dadis](http://www.fao.org/dadis). [Accessed 14/02/2019].
- 505 Hall, SJ (2016). Effective population sizes in cattle, sheep, horses, pigs and goats estimated  
506 from census and herdbook data. *Animal* 10, 1778-1785. doi:  
507 10.1017/s1751731116000914.
- 508 Hanrahan, JP. 1999. The Galway Breed – Origins and the Future; available at  
509 [www.galwaysheep.ie](http://www.galwaysheep.ie). [Accessed 13/07/2018].
- 510 Howard, DJ (2008). *A Comparative Study of Molecular Genetic Variation in Three Irish Sheep*  
511 *Breeds; the Galway, Texel and Suffolk*. PhD thesis, University College Dublin.
- 512 Jiang, Y, Xie, M, Chen, W, Talbot, R, Maddox, JF, Faraut, T, Wu, C, Muzny, DM, Li, Y,  
513 Zhang, W, Stanton, JA, Brauning, R, Barris, WC, Hourlier, T, Aken, BL, Searle, SM,  
514 Adelson, DL, Bian, C, Cam, GR, Chen, Y, Cheng, S, DeSilva, U, Dixen, K, Dong, Y,



- 515 Fan, G, Franklin, IR, Fu, S, Fuentes-Utrilla, P, Guan, R, Highland, MA, Holder, ME,  
516 Huang, G, Ingham, AB, Jhangiani, SN, Kalra, D, Kovar, CL, Lee, SL, Liu, W, Liu, X,  
517 Lu, C, Lv, T, Mathew, T, McWilliam, S, Menzies, M, Pan, S, Robelin, D, Servin, B,  
518 Townley, D, Wang, W, Wei, B, White, SN, Yang, X, Ye, C, Yue, Y, Zeng, P, Zhou, Q,  
519 Hansen, JB, Kristiansen, K, Gibbs, RA, Flicek, P, Warkup, CC, Jones, HE, Oddy, VH,  
520 Nicholas, FW, McEwan, JC, Kijas, JW, Wang, J, Worley, KC, Archibald, AL, Cockett,  
521 N, Xu, X, Wang, W, and Dalrymple, BP (2014). The sheep genome illuminates biology  
522 of the rumen and lipid metabolism. *Science* 344, 1168-1173. doi:  
523 10.1126/science.1252806.
- 524 Kijas, JW, Lenstra, JA, Hayes, B, Boitard, S, Porto Neto, LR, San Cristobal, M, Servin, B,  
525 McCulloch, R, Whan, V, Gietzen, K, Paiva, S, Barendse, W, Ciani, E, Raadsma, H,  
526 McEwan, J, Dalrymple, B, and International Sheep Genomics Consortium (2012).  
527 Genome-wide analysis of the world's sheep breeds reveals high levels of historic  
528 mixture and strong recent selection. *PLoS Biol* 10, e1001258. doi:  
529 10.1371/journal.pbio.1001258.
- 530 Kijas, JW, Townley, D, Dalrymple, BP, Heaton, MP, Maddox, JF, McGrath, A, Wilson, P,  
531 Ingersoll, RG, McCulloch, R, McWilliam, S, Tang, D, McEwan, J, Cockett, N, Oddy,  
532 VH, Nicholas, FW, and Raadsma, H (2009). A genome wide survey of SNP variation  
533 reveals the genetic structure of sheep breeds. *PLoS ONE* 4, e4668. doi:  
534 10.1371/journal.pone.0004668.
- 535 Krämer, A, Green, J, Pollard Jr, J, and Tugendreich, S (2013). Causal analysis approaches in  
536 ingenuity pathway analysis. *Bioinformatics* 30, 523-530.
- 537 Larson, G, and Fuller, DQ (2014). The evolution of animal domestication. *Annu Rev Ecol Evol*  
538 *Syst* 45, 115-136. doi: 10.1146/annurev-ecolsys-110512-135813.
- 539 MacHugh, DE, Larson, G, and Orlando, L (2017). Taming the past: ancient DNA and the study  
540 of animal domestication. *Annu Rev Anim Biosci* 5, 329-351. doi: 10.1146/annurev-  
541 animal-022516-022747.
- 542 Martin, I (1975a). A genetic analysis of the Galway sheep breed: 1. some aspects of population  
543 dynamics of the pedigree and non-pedigree Galway sheep breed. *Ir J Agric Sci* 14, 245-  
544 253.
- 545 Martin, I (1975b). A genetic analysis of the Galway sheep breed: 3. level of inbreeding in the  
546 pedigree Galway sheep breed. *Ir J Agric Sci* 14, 269-274.



- 547 McHugh, N, Berry, D, McParland, S, Wall, E, and Pabiou, T (2014). *Irish sheep breeding:*  
548 *current status and future plans*. Teagasc and Sheep Ireland.
- 549 McQuillan, R, Leutenegger, AL, Abdel-Rahman, R, Franklin, CS, Pericic, M, Barac-Lauc, L,  
550 Smolej-Narancic, N, Janicijevic, B, Polasek, O, Tenesa, A, Macleod, AK, Farrington,  
551 SM, Rudan, P, Hayward, C, Vitart, V, Rudan, I, Wild, SH, Dunlop, MG, Wright, AF,  
552 Campbell, H, and Wilson, JF (2008). Runs of homozygosity in European populations.  
553 *Am J Hum Genet* 83, 359-372. doi: 10.1016/j.ajhg.2008.08.007.
- 554 Meuwissen, T (2009). Genetic management of small populations: A review. *Acta Agric Scand*  
555 *A Anim Sci* 59, 71-79. doi: 10.1080/09064700903118148.
- 556 Mullen, MP, Hanrahan, JP, Howard, DJ, and Powell, R (2013). Investigation of prolific sheep  
557 from UK and Ireland for evidence on origin of the mutations in *BMP15* (*FecX<sup>G</sup>*, *FecX<sup>B</sup>*)  
558 and *GDF9* (*FecG<sup>H</sup>*) in Belclare and Cambridge sheep. *PLoS ONE* 8, e53172. doi:  
559 10.1371/journal.pone.0053172.
- 560 Patterson, N, Price, AL, and Reich, D (2006). Population structure and eigenanalysis. *PLoS*  
561 *Genet* 2, e190. doi: 10.1371/journal.pgen.0020190.
- 562 Peripolli, E, Munari, DP, Silva, M, Lima, ALF, Irgang, R, and Baldi, F (2017). Runs of  
563 homozygosity: current knowledge and applications in livestock. *Anim Genet* 48, 255-  
564 271. doi: 10.1111/age.12526.
- 565 Petersen, B (2017). Basics of genome editing technology and its application in livestock  
566 species. *Reprod Domest Anim* 52 Suppl 3, 4-13. doi: 10.1111/rda.13012.
- 567 Pickrell, JK, and Pritchard, JK (2012). Inference of population splits and mixtures from  
568 genome-wide allele frequency data. *PLoS Genet* 8, e1002967. doi:  
569 10.1371/journal.pgen.1002967.
- 570 Porter, V, Alderson, L, Hall, SJG, and Sponenberg, DP (2016). *Mason's World Encyclopedia*  
571 *of Livestock Breeds and Breeding*. Wallingford, UK: CABI.
- 572 Purcell, S, Neale, B, Todd-Brown, K, Thomas, L, Ferreira, MA, Bender, D, Maller, J, Sklar, P,  
573 de Bakker, PI, Daly, MJ, and Sham, PC (2007). PLINK: a tool set for whole-genome  
574 association and population-based linkage analyses. *Am J Hum Genet* 81, 559-575. doi:  
575 10.1086/519795.
- 576 Purfield, DC, Berry, DP, McParland, S, and Bradley, DG (2012). Runs of homozygosity and  
577 population history in cattle. *BMC Genet* 13, 70. doi: 10.1186/1471-2156-13-70.

- 578 Purfield, DC, McParland, S, Wall, E, and Berry, DP (2017). The distribution of runs of  
579 homozygosity and selection signatures in six commercial meat sheep breeds. *PLoS*  
580 *ONE* 12, e0176780. doi: 10.1371/journal.pone.0176780.
- 581 R Core Team. 2018. R: A Language and Environment for Statistical Computing. Available:  
582 <https://www.R-project.org>.
- 583 Raftice, MJ (2001). *Genetic Conservation of the Galway Sheep Breed*. MSc thesis, University  
584 College Dublin.
- 585 Raj, A, Stephens, M, and Pritchard, JK (2014). fastSTRUCTURE: variational inference of  
586 population structure in large SNP data sets. *Genetics* 197, 573-589. doi:  
587 10.1534/genetics.114.164350.
- 588 Randhawa, IA, Khatkar, MS, Thomson, PC, and Raadsma, HW (2014). Composite selection  
589 signals can localize the trait specific genomic regions in multi-breed populations of  
590 cattle and sheep. *BMC Genet* 15, 34. doi: 10.1186/1471-2156-15-34.
- 591 Rosenberg, NA (2004). DISTRUCT: a program for the graphical display of population  
592 structure. *Mol Ecol Notes* 4, 137-138.
- 593 Smedley, D, Haider, S, Durinck, S, Pandini, L, Provero, P, Allen, J, Arnaiz, O, Awedh, MH,  
594 Baldock, R, Barbiera, G, Bardou, P, Beck, T, Blake, A, Bonierbale, M, Brookes, AJ,  
595 Bucci, G, Buetti, I, Burge, S, Cabau, C, Carlson, JW, Chelala, C, Chrysostomou, C,  
596 Cittaro, D, Collin, O, Cordova, R, Cutts, RJ, Dassi, E, Di Genova, A, Djari, A, Esposito,  
597 A, Estrella, H, Eyraas, E, Fernandez-Banet, J, Forbes, S, Free, RC, Fujisawa, T,  
598 Gadaleta, E, Garcia-Manteiga, JM, Goodstein, D, Gray, K, Guerra-Assuncao, JA,  
599 Haggarty, B, Han, DJ, Han, BW, Harris, T, Harshbarger, J, Hastings, RK, Hayes, RD,  
600 Hoede, C, Hu, S, Hu, ZL, Hutchins, L, Kan, Z, Kawaji, H, Keliet, A, Kerhornou, A,  
601 Kim, S, Kinsella, R, Klopp, C, Kong, L, Lawson, D, Lazarevic, D, Lee, JH, Letellier,  
602 T, Li, CY, Lio, P, Liu, CJ, Luo, J, Maass, A, Mariette, J, Maurel, T, Merella, S,  
603 Mohamed, AM, Moreews, F, Nabihoudine, I, Ndegwa, N, Noirot, C, Perez-Llamas, C,  
604 Primig, M, Quattrone, A, Quesneville, H, Rambaldi, D, Reecy, J, Riba, M, Rosanoff,  
605 S, Saddiq, AA, Salas, E, Sallou, O, Shepherd, R, Simon, R, Sperling, L, Spooner, W,  
606 Staines, DM, Steinbach, D, Stone, K, Stupka, E, Teague, JW, Dayem Ullah, AZ, Wang,  
607 J, Ware, D, et al. (2015). The BioMart community portal: an innovative alternative to  
608 large, centralized data repositories. *Nucleic Acids Res* 43, W589-598. doi:  
609 10.1093/nar/gkv350.

- 610 Taberlet, P, Coissac, E, Pansu, J, and Pompanon, F (2011). Conservation genetics of cattle,  
611 sheep, and goats. *C R Biol* 334, 247-254. doi: 10.1016/j.crv.2010.12.007.
- 612 Taberlet, P, Valentini, A, Rezaei, H, Naderi, S, Pompanon, F, Negrini, R, and Ajmone-Marsan,  
613 P (2008). Are cattle, sheep, and goats endangered species? *Mol Ecol* 17, 275-284.
- 614 Tapio, M, Tapio, I, Grislis, Z, Holm, LE, Jeppsson, S, Kantanen, J, Miceikiene, I, Olsaker, I,  
615 Viinalass, H, and Eythorsdottir, E (2005). Native breeds demonstrate high contributions  
616 to the molecular variation in northern European sheep. *Mol Ecol* 14, 3951-3963. doi:  
617 10.1111/j.1365-294X.2005.02727.x.
- 618 Timmons, JA, Szkop, KJ, and Gallagher, IJ (2015). Multiple sources of bias confound  
619 functional enrichment analysis of global -omics data. *Genome Biol* 16, 186. doi:  
620 10.1186/s13059-015-0761-7.
- 621 Toolan, DP, Mitchell, G, Searle, K, Sheehan, M, Skuce, PJ, and Zadoks, RN (2015). Bovine  
622 and ovine rumen fluke in Ireland—Prevalence, risk factors and species identity based  
623 on passive veterinary surveillance and abattoir findings. *Vet Parasitol* 212, 168-174.
- 624 Van Eenennaam, AL (2017). Genetic modification of food animals. *Curr Opin Biotechnol* 44,  
625 27-34. doi: <http://dx.doi.org/10.1016/j.copbio.2016.10.007>.
- 626 Wang, J, Zhou, H, Hu, J, Li, S, Luo, Y, and Hickford, JG (2016). Two single nucleotide  
627 polymorphisms in the promoter of the ovine myostatin gene (*MSTN*) and their effect on  
628 growth and carcass muscle traits in New Zealand Romney sheep. *J Anim Breed Genet*  
629 133, 219-226. doi: 10.1111/jbg.12171.
- 630 Waples, RK, Larson, WA, and Waples, RS (2016). Estimating contemporary effective  
631 population size in non-model species using linkage disequilibrium across thousands of  
632 loci. *Heredity (Edinb)* 117, 233-240. doi: 10.1038/hdy.2016.60.
- 633 Weir, BS, and Cockerham, CC (1984). Estimating F-statistics for the analysis of population  
634 structure. *Evolution*, 1358-1370.
- 635 Wells, KD (2013). Natural genotypes via genetic engineering. *Proc Natl Acad Sci U S A* 110,  
636 16295-16296. doi: 10.1073/pnas.1315623110.
- 637 Wickham, H (2016). *ggplot2: Elegant Graphics for Data Analysis*. Springer Publishing  
638 Company, New York, USA.
- 639 Wykes, DL (2004). Robert Bakewell (1725-1795) of Dishley: farmer and livestock improver.  
640 *Agric Hist Rev* 52, 38-55.

641

642 **TABLES**

643 **TABLE 1** | Top five physiological system development and function pathways enriched for  
644 the 119 candidate genes proximal to the five detected selection peaks.

| <b>Pathway</b>                                 | <b>No. of Genes</b> | <b>Range of <i>P</i>-values</b> |
|------------------------------------------------|---------------------|---------------------------------|
| Tissue development                             | 28                  | 0.037–0.000                     |
| Haematological system development and function | 26                  | 0.037–0.000                     |
| Hair and skin development and function         | 7                   | 0.016–0.000                     |
| Immune cell trafficking                        | 13                  | 0.037–0.001                     |
| Connective tissue development and function     | 15                  | 0.037–0.001                     |

645

In review

## 646 **FIGURE LEGENDS**

647 **FIGURE 1** | Map showing the geographical locations where breeds historically originated,  
648 adapted from Kijas et al. (2012). The number in brackets indicates the sample size. The breeds  
649 shown are the Australian Merino (MER), Border Leicester (BRL), Dorset Horn (DSH), Finnish  
650 Landrace (FIN), Galway (GAL), Irish Suffolk (ISF), New Zealand Romney (ROM), Scottish  
651 Blackface (SBF), Soay (SOA), Scottish Texel (STX) and Wiltshire (WIL).

652

653 **FIGURE 2** | PCA plot generated using 47,412 genome-wide SNPs without the Soay sheep  
654 breed (SOA). The first principal component (PC1) is shown on the x-axis and the second  
655 principal component (PC2) is shown on the y-axis. Each breed is designated a different colour  
656 and certain individual animals that do not group by breed are labelled. The bar chart shows the  
657 proportion of variation explained by each principal component. (For comparison, PC1 versus  
658 PC3 is shown in Supplementary **Figure S3** and PC1 versus PC4 is shown in Supplementary  
659 **Figure S4**.)

660

661 **FIGURE 3** | Maximum likelihood (ML) phylogenetic tree network graph generated using  
662 47,412 genome-wide SNPs with five migration edges showing the relationships among 12  
663 sheep breeds (A) and the residuals (B). The arrows indicate gene flow events between the  
664 populations and the colours of the arrows indicate the relative weights of migration.

665

666 **FIGURE 4** | Hierarchical clustering of individual animals using 47,412 genome-wide SNPs.  
667 Results are shown for a range of assumed values ( $K = 2 - 11$ ) for the number of ancestral  
668 populations.

669

670 **FIGURE 5** | Trends in effective population size ( $N_e$ ) estimated using 47,412 genome-wide  
671 SNPs.

672

673 **FIGURE 6** | Tukey box plots showing the distribution of  $F$  values, estimated using 47,412  
674 genome-wide SNPs, for the Galway sheep breed (GAL) and 10 comparator breeds. The single  
675 GAL26 outlier is labelled.

676

677 **FIGURE 7** | Tukey box plots showing the distribution of  $F_{ROH}$  values estimated using 47,412  
678 genome-wide SNPs, for the Galway sheep breed (GAL) and 10 comparator sheep breeds. Five  
679 outlier GAL animals are labelled.

680

681 **FIGURE 8** | Bar graph showing the mean total length of runs of homozygosity (ROH) in  
682 different tract length categories for the Galway sheep breed (GAL) and 10 comparator sheep  
683 breeds.

684

685 **FIGURE 9** | Manhattan plots of composite selection signal (CSS) results for Galway sheep ( $n$   
686 = 49) contrasted with a random group selected from the other 10 breeds in the core data set ( $n$   
687 = 50). (A) Unsmoothed results. (B) Smoothed results obtained by averaging CSS of SNPs  
688 within each 1Mb window. Red dotted line on each plot denotes the genome-wide 0.1%  
689 threshold for the empirical CSS scores. Red vertical arrows indicate selection peaks detected  
690 on OAR1, OAR3 and OAR8.

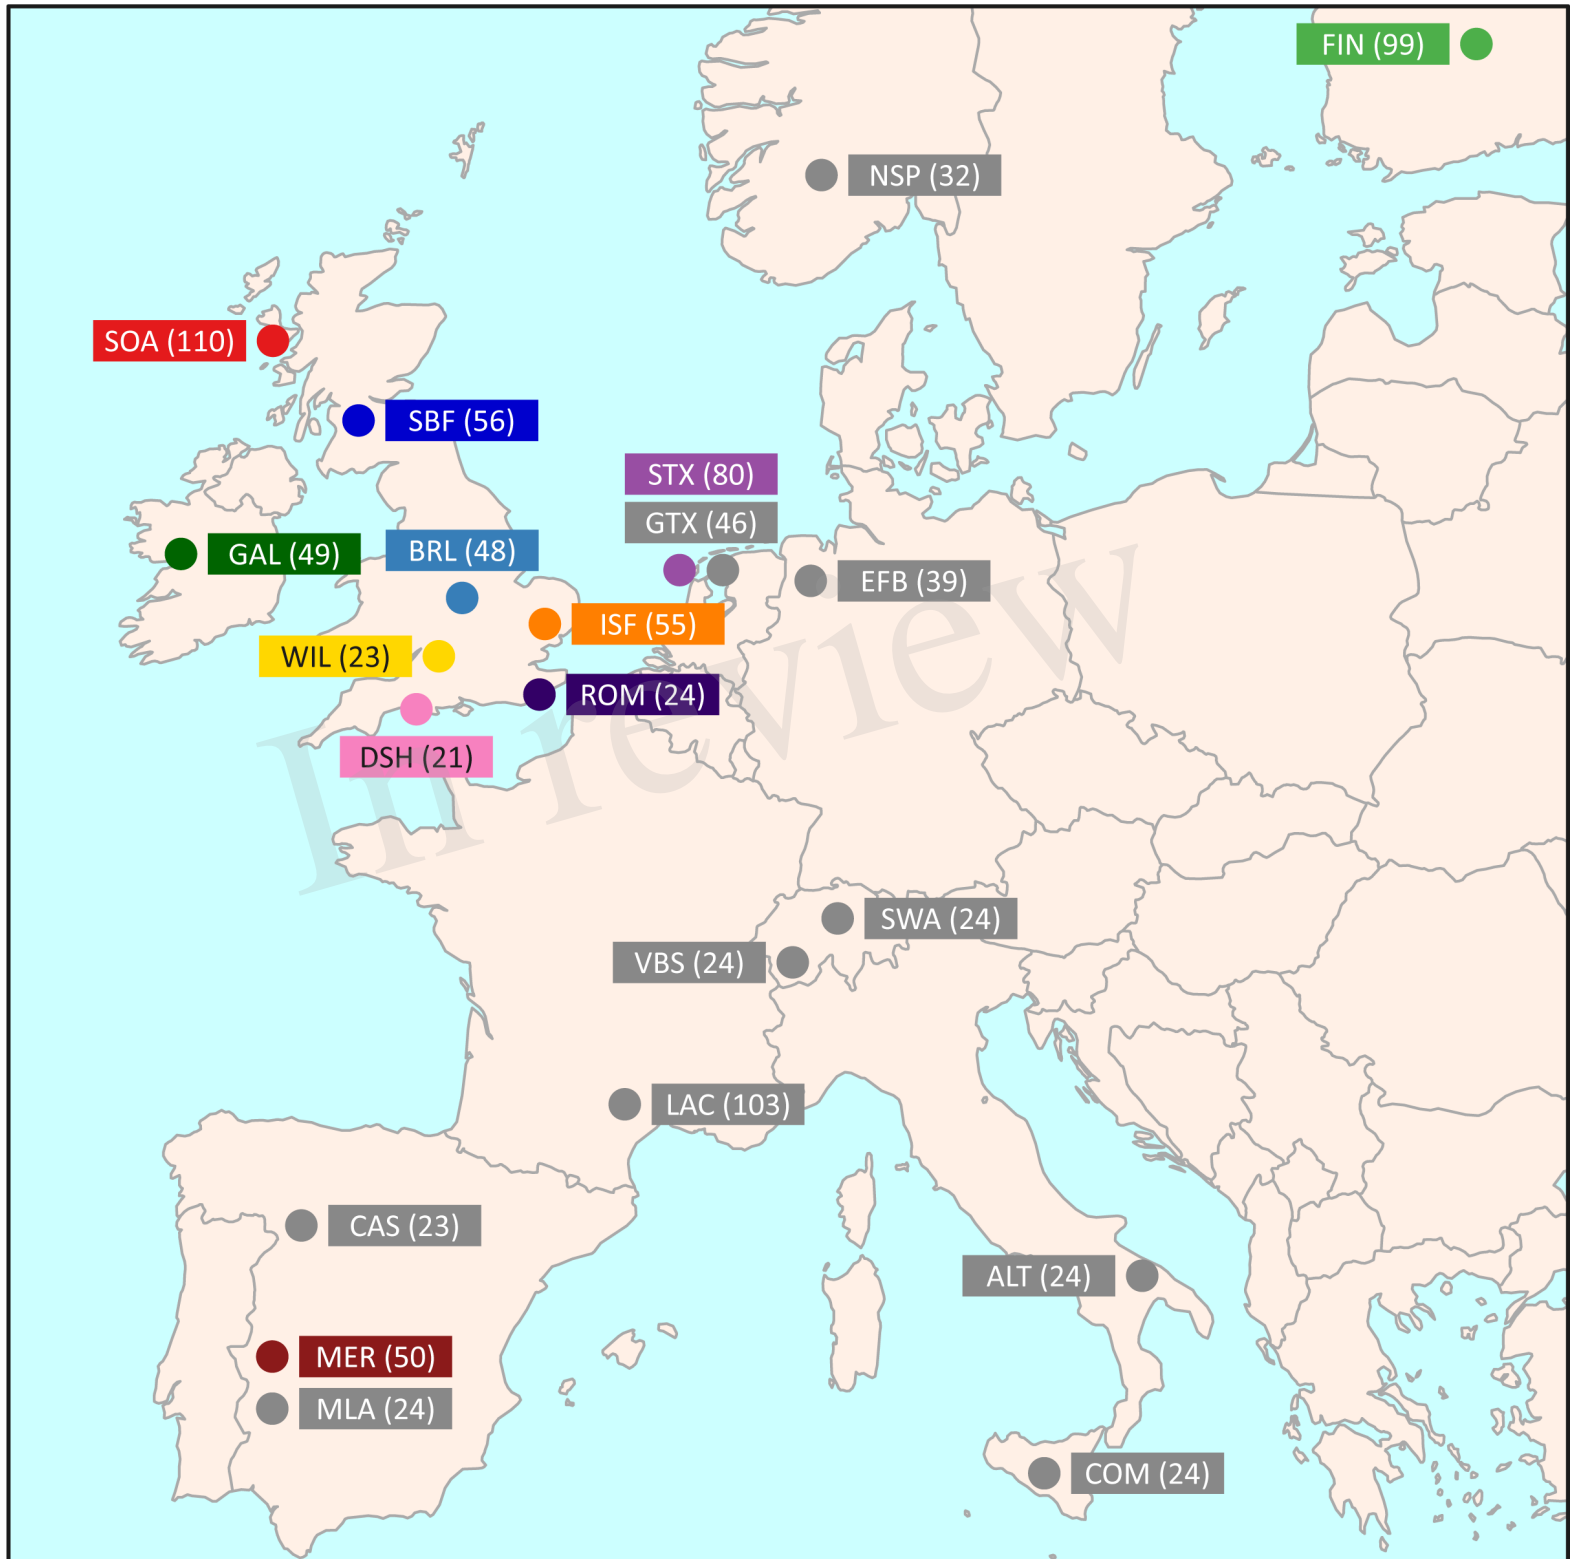

Figure 11

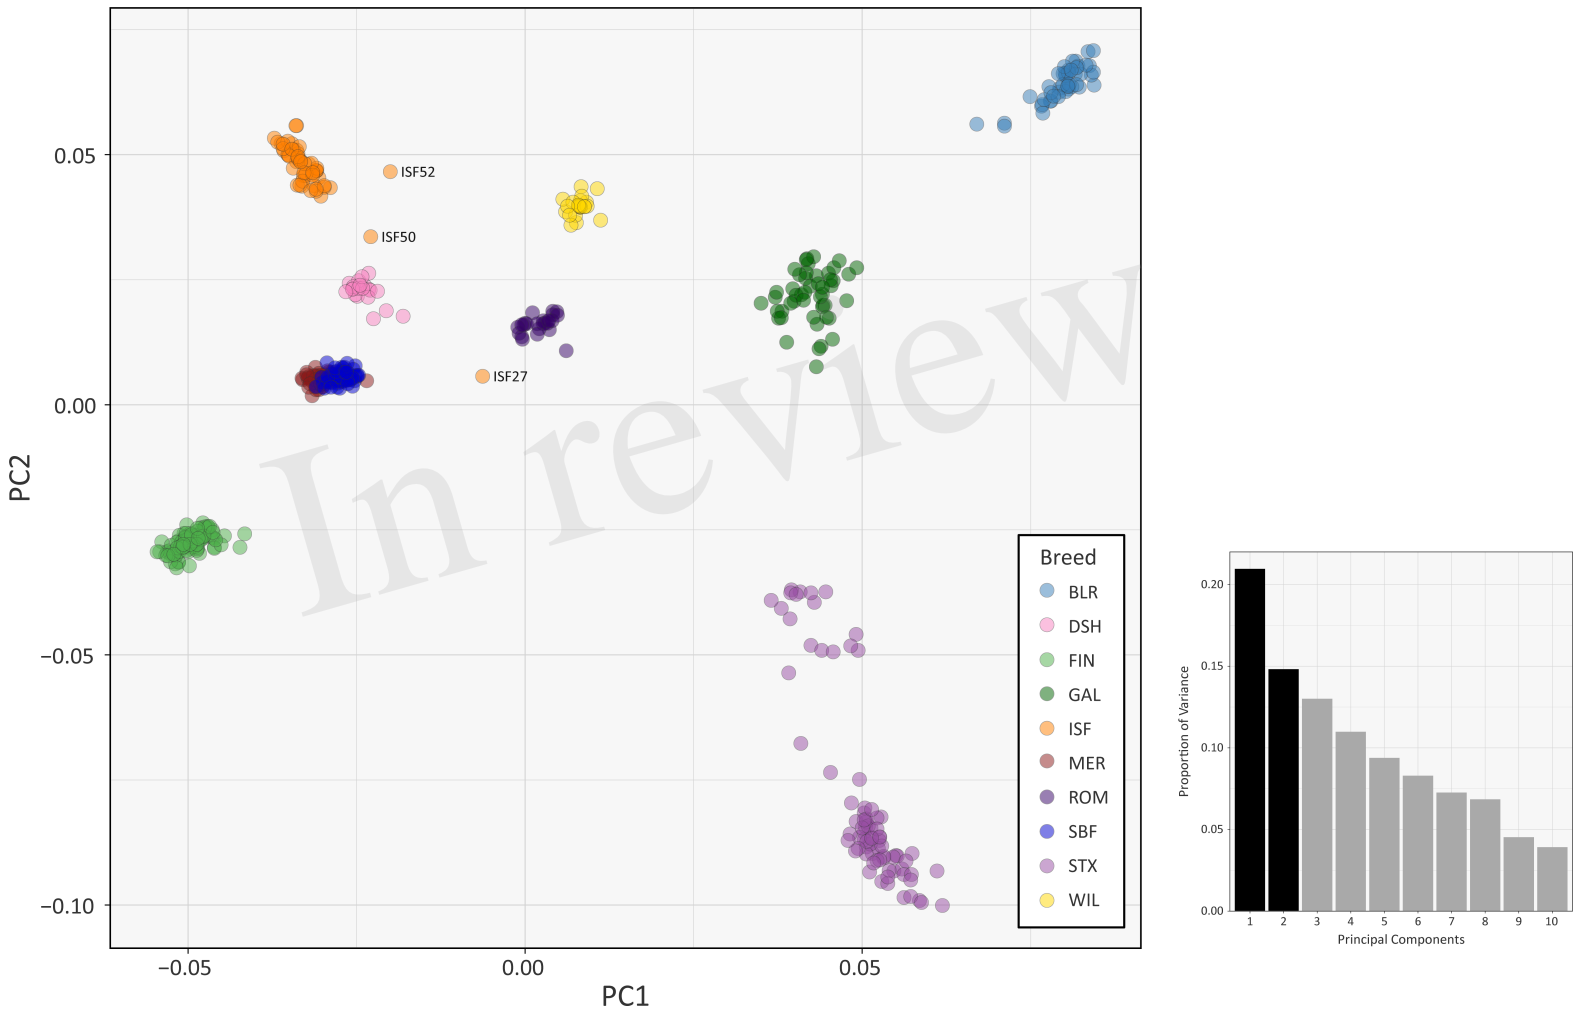



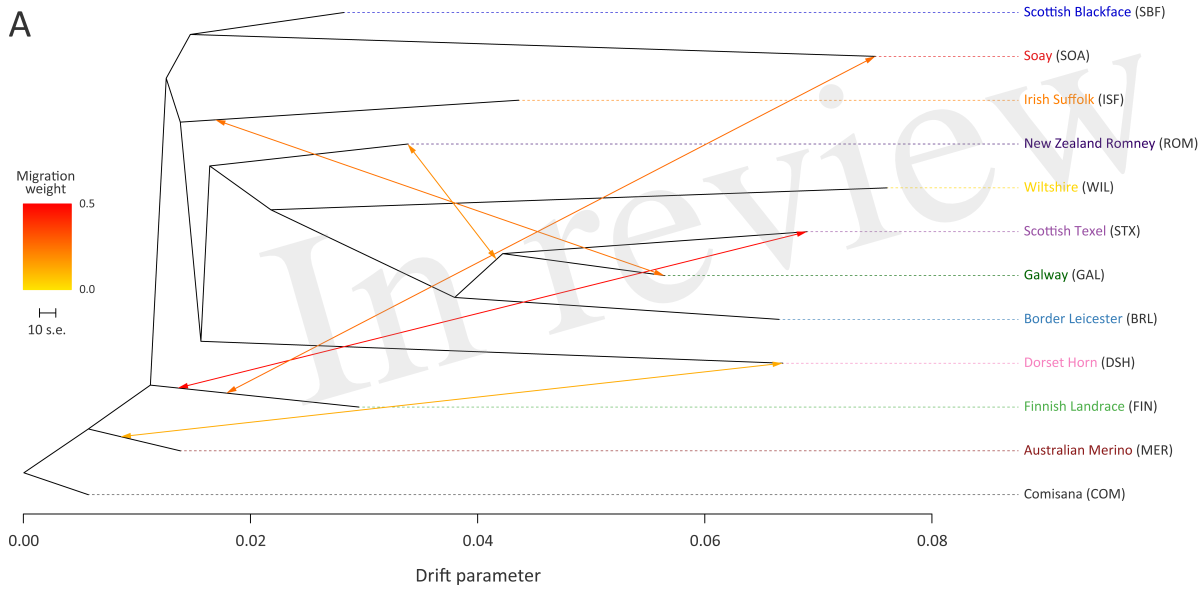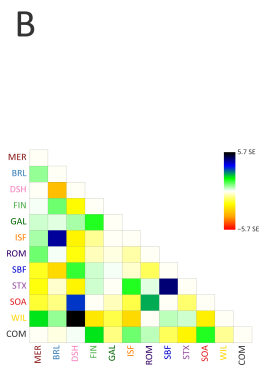

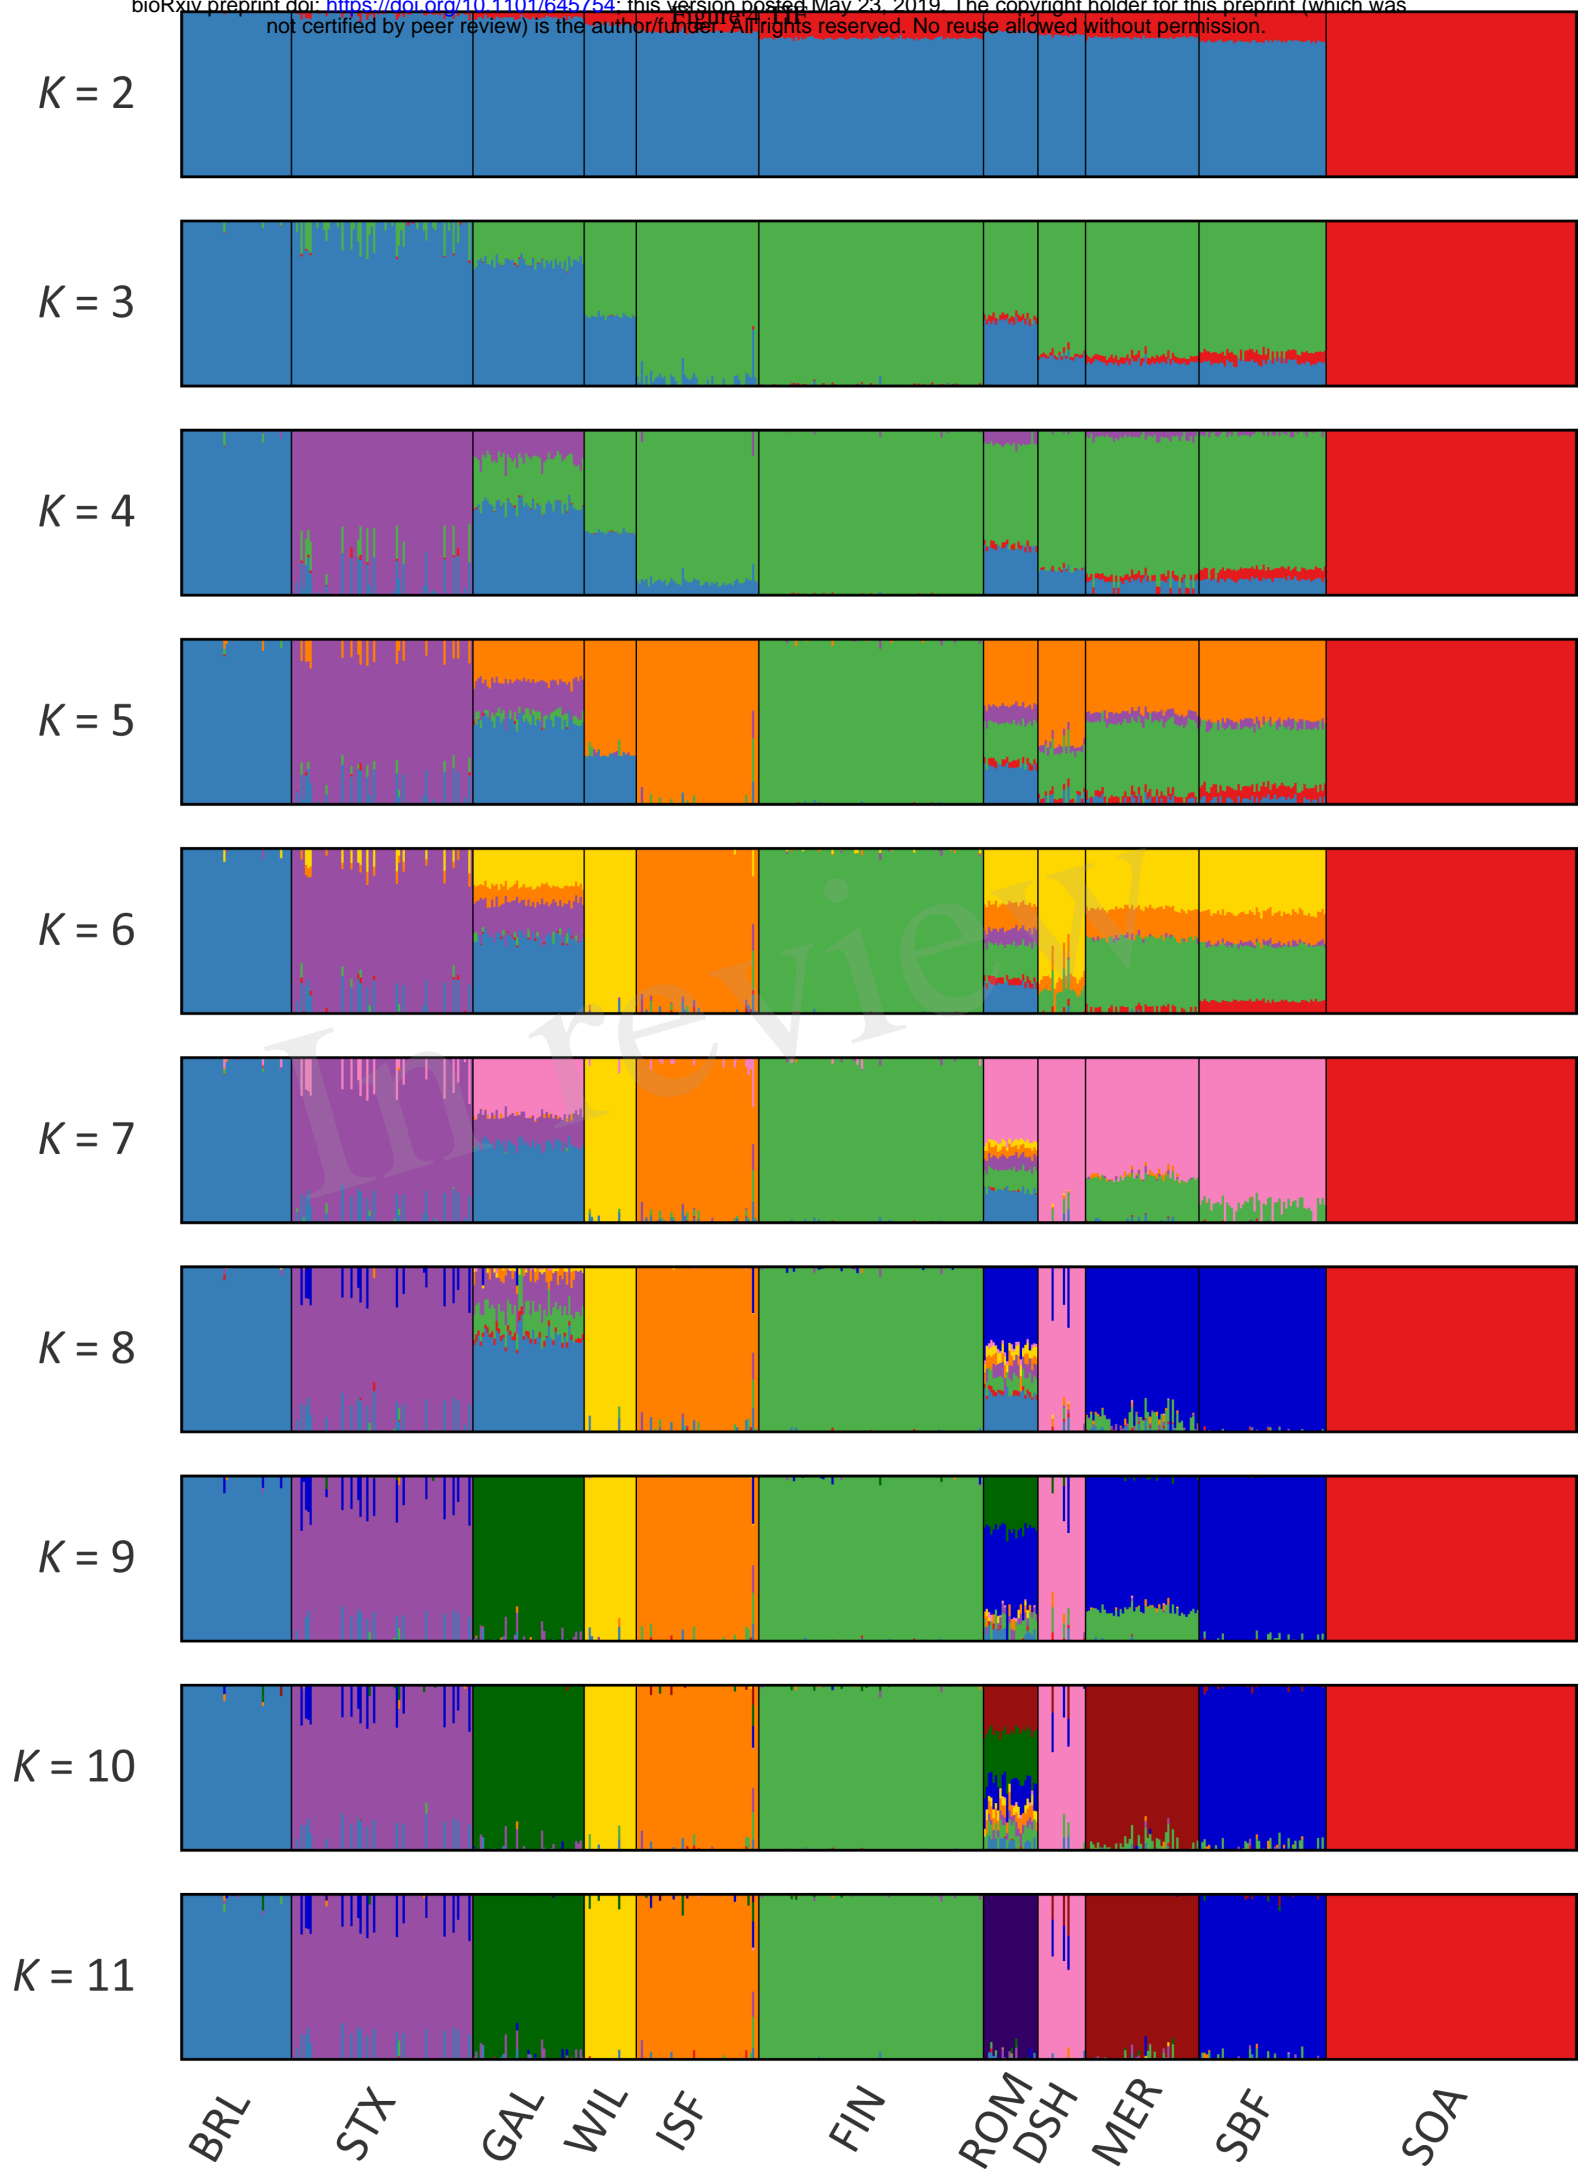

Effective Population Size ( $N_e$ )

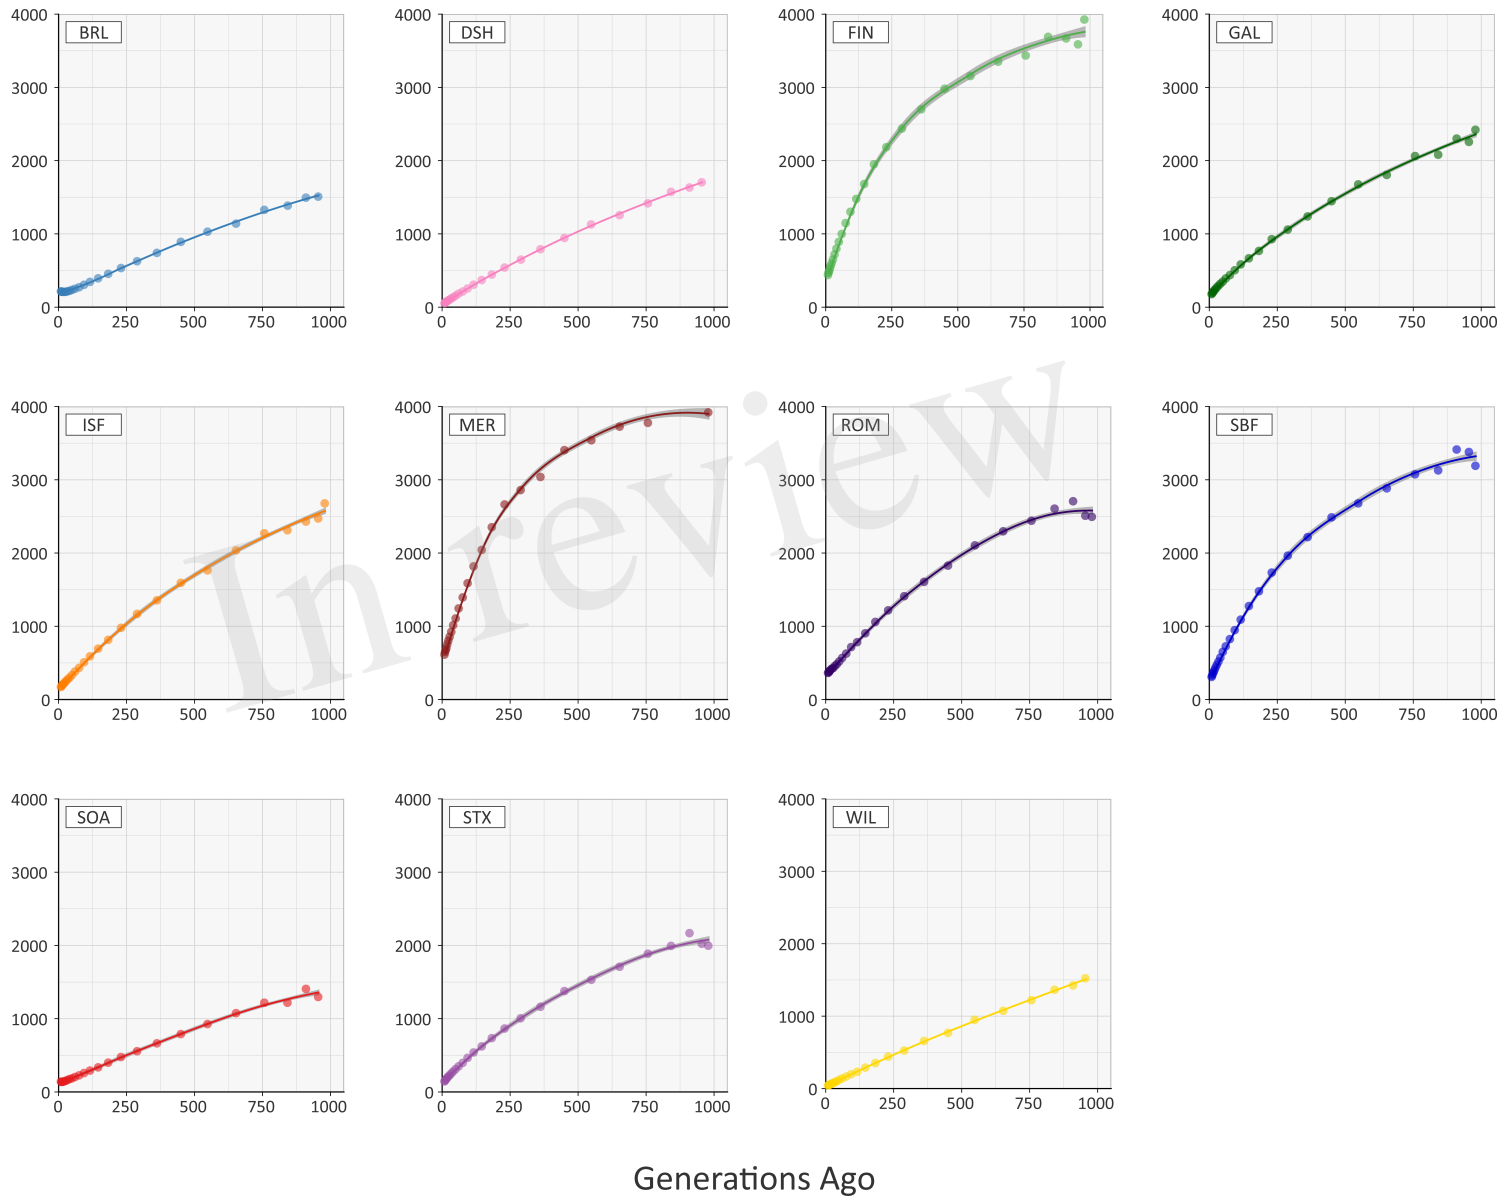

Figure 11

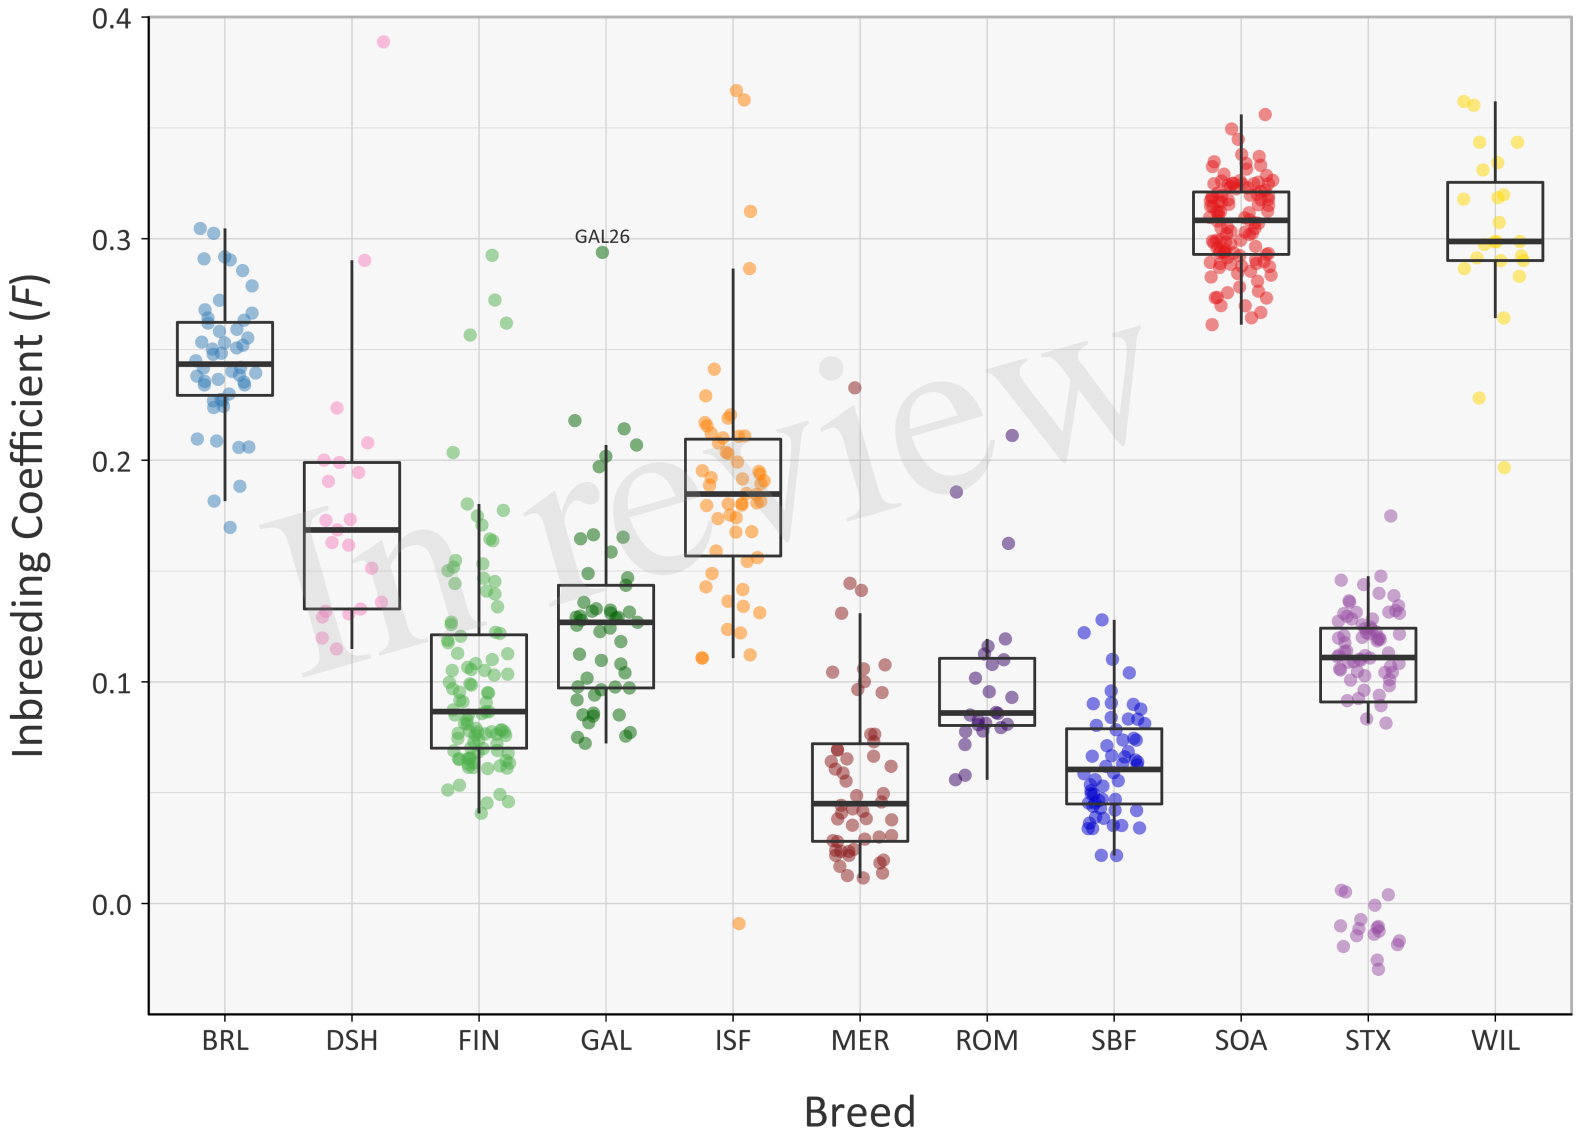

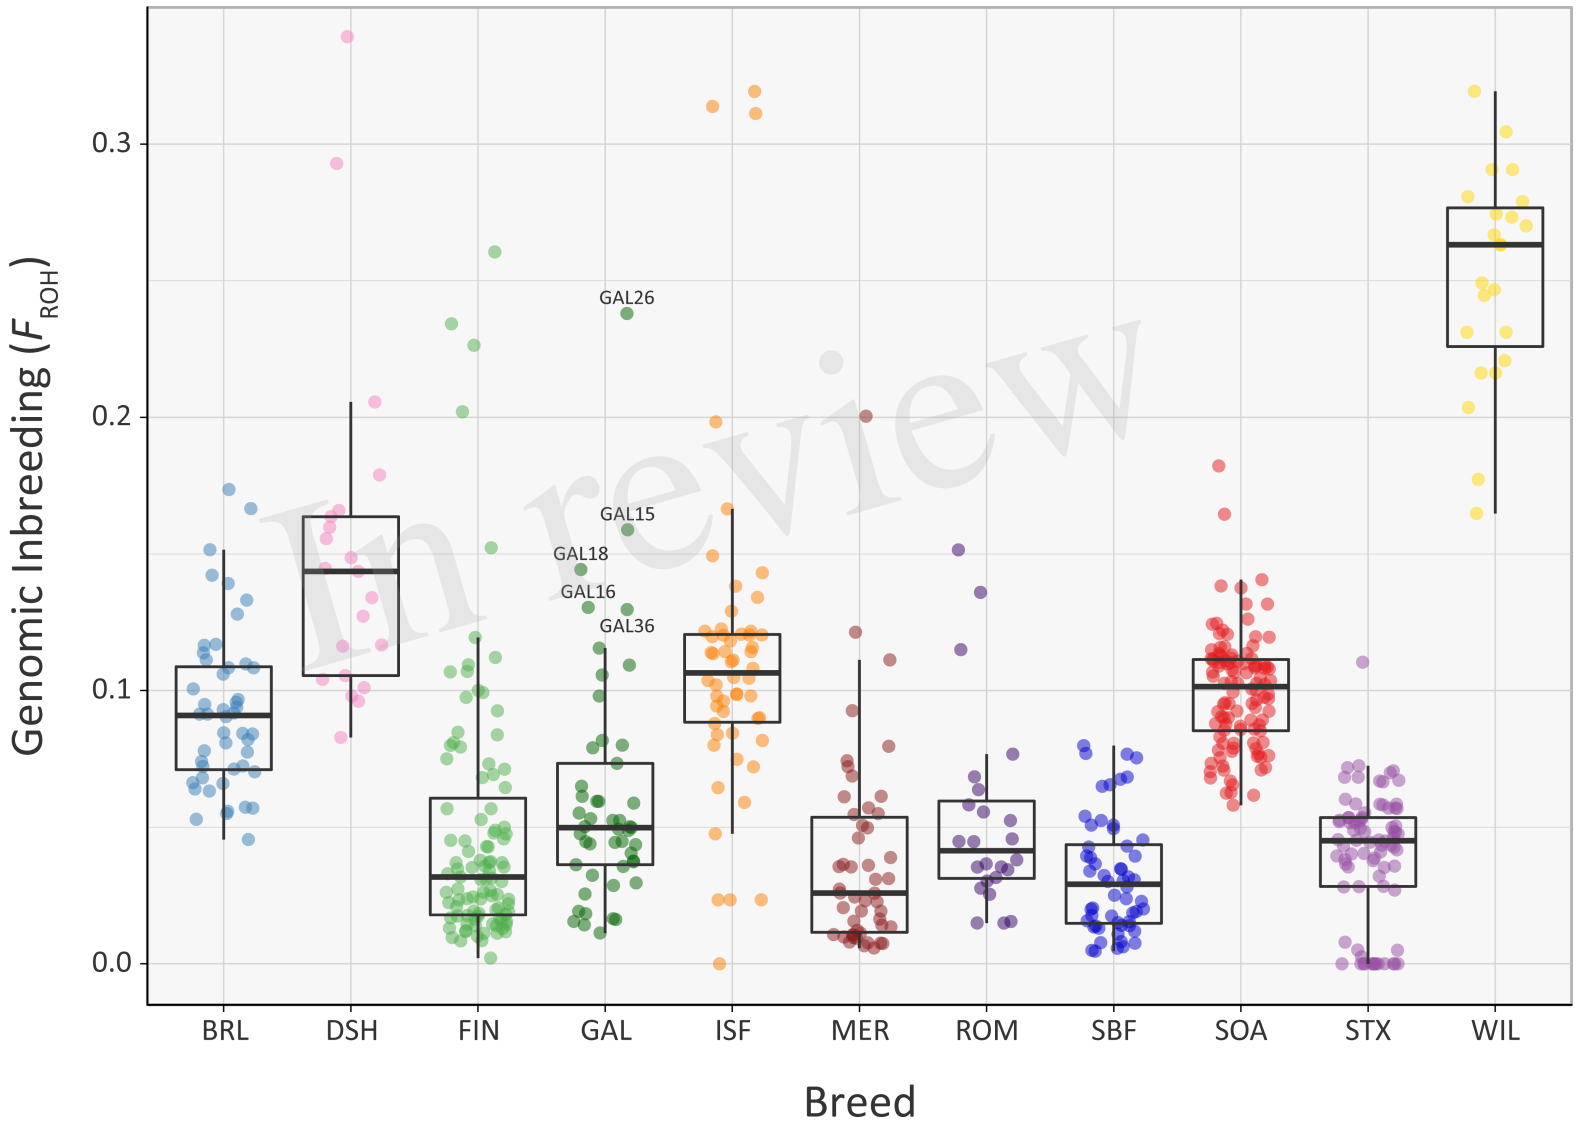

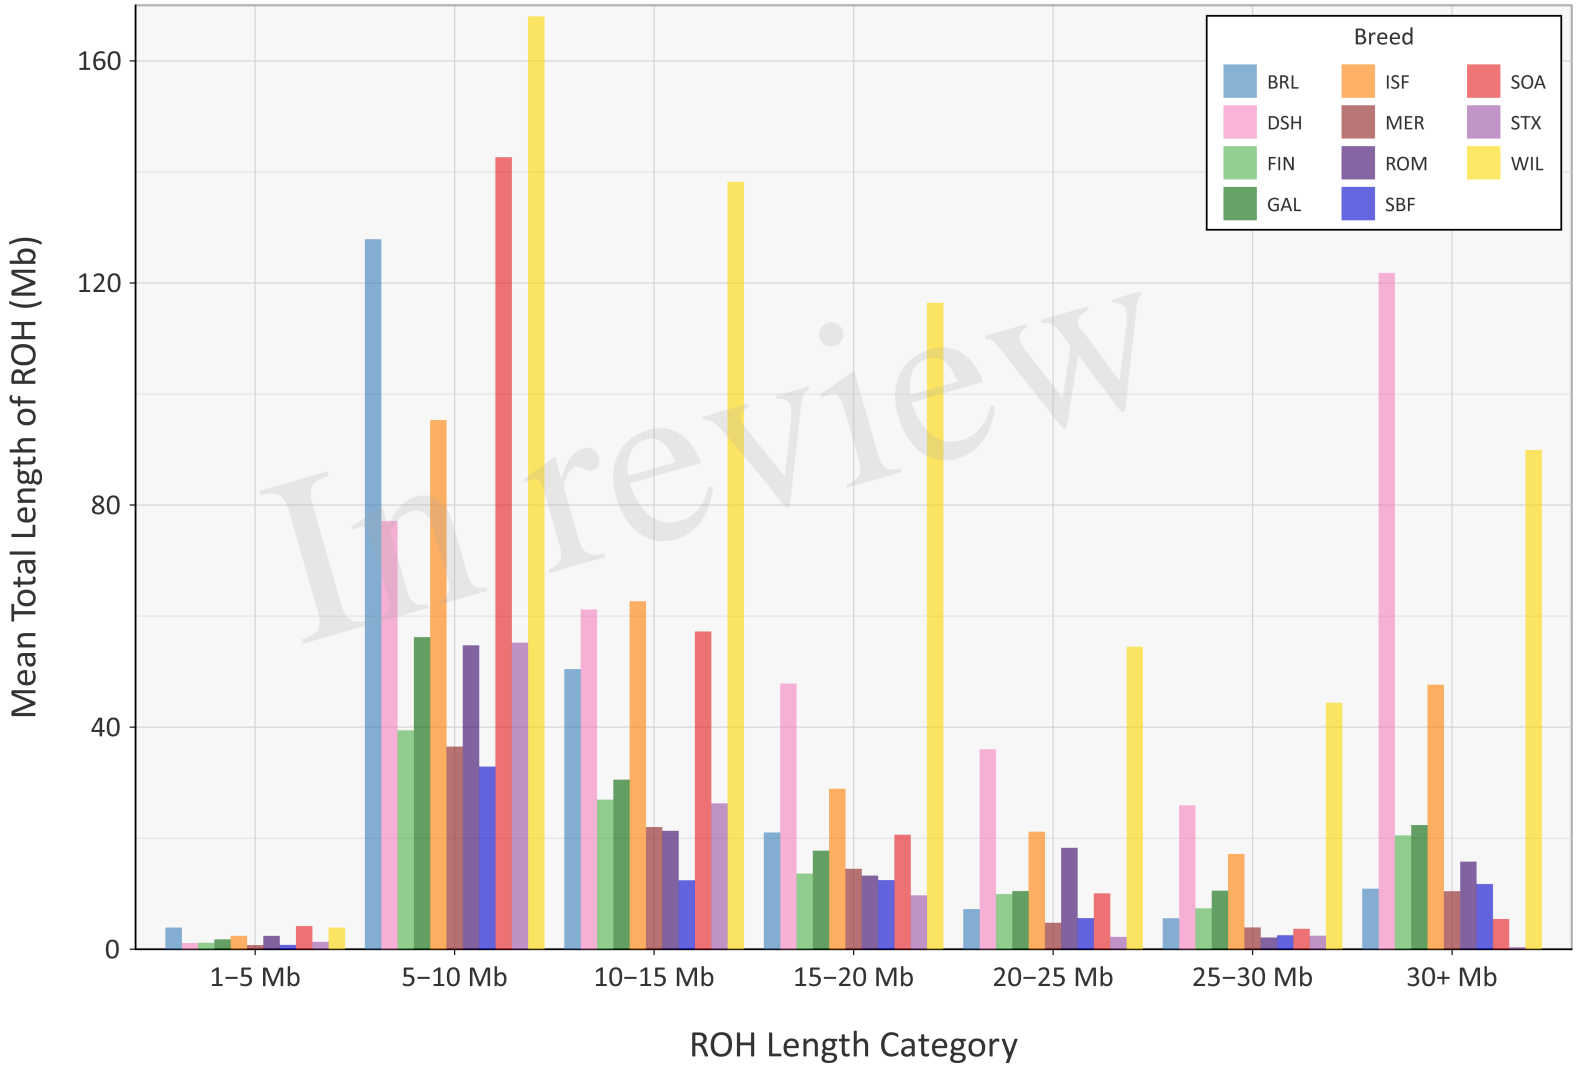

**A**

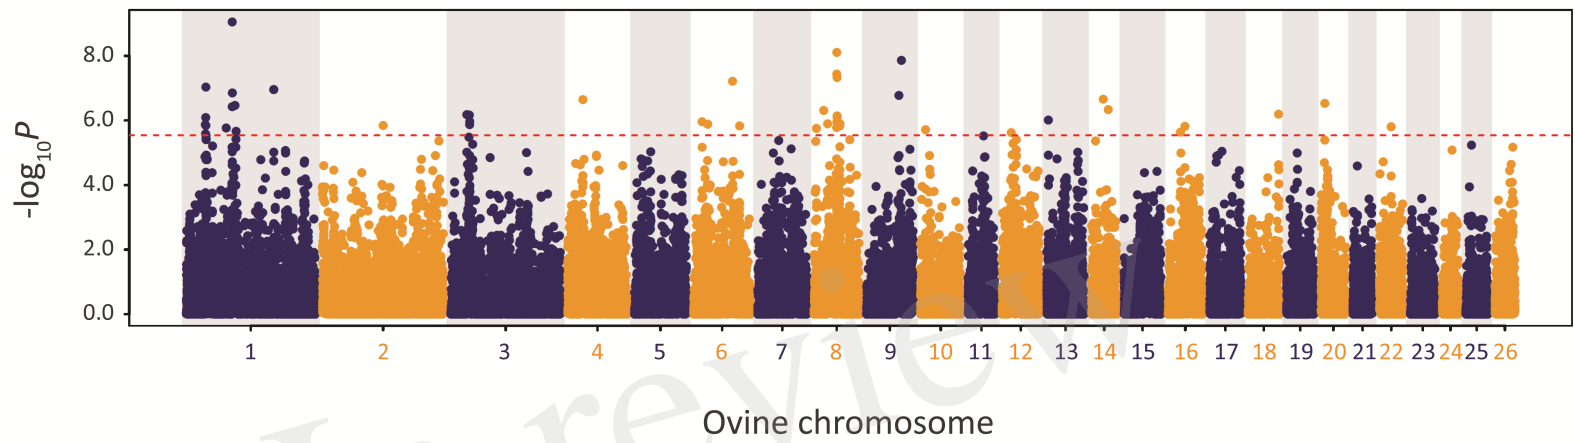

**B**

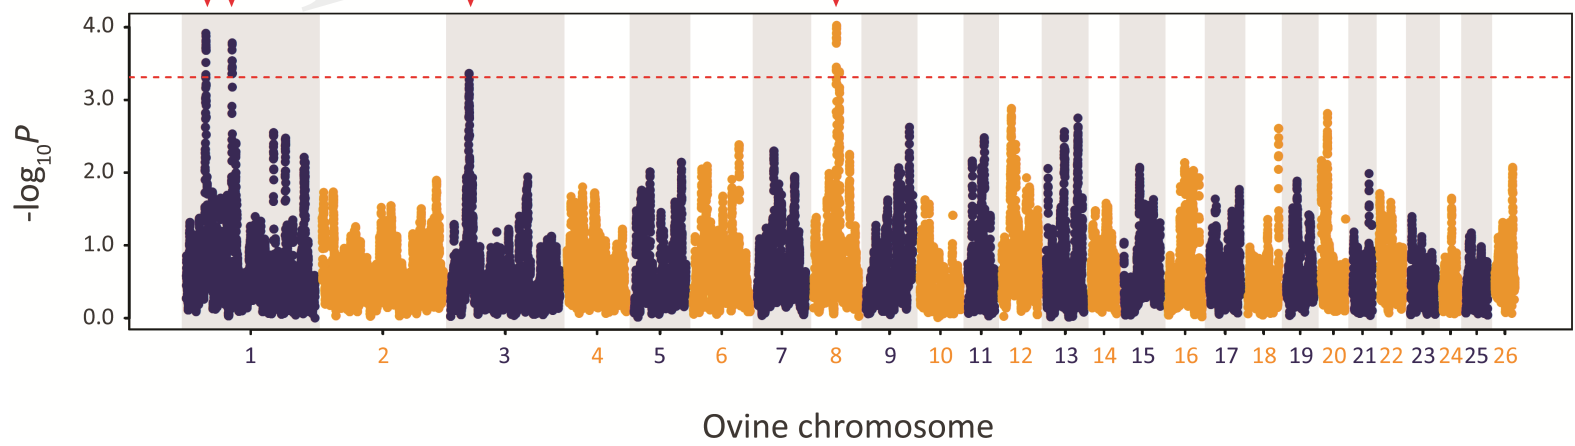

Source: https://www.biorxiv.org/content/10.1101/645754v1.full.pdf
